# Supplementary material for: SorCS3 promotes the internalization of p75NTR to inhibit GBM progression
Source: PubMed Central journal article supplement (PMC8989992; doi:10.1038/s41419-022-04753-5), 2022-04-07
Supplement: 41419_2022_4753_MOESM5_ESM.pdf [file 41419_2022_4753_MOESM5_ESM.pdf]

Table 2: Information of antibodies used in this study

| Antibody Name                | Company                           | Application | Dilution | Host   |
|------------------------------|-----------------------------------|-------------|----------|--------|
| <b>SorCS3</b>                | R&D bio-techne                    | WB          | 1:1000   | Goat   |
|                              | Antibodies-Online                 | WB          | 1:500    | Rabbit |
|                              | Bioss                             | WB          | 1:1000   | Rabbit |
| <b>p75NTR</b>                | Cell Signaling Technolog<br>(CST) | WB          | 1:1000   | Mouse  |
|                              |                                   | Co-IP       | 1:50     | Rabbit |
|                              |                                   | IF          | 1:600    | Rabbit |
| <b>Akt</b>                   | CST                               | WB          | 1:1000   | Rabbit |
| <b>p-Akt (Ser473)</b>        | CST                               | WB          | 1:2000   | Rabbit |
| <b>ERK</b>                   | CST                               | WB          | 1:1000   | Rabbit |
| <b>p-ERK (Thr202/Tyr204)</b> | CST                               | WB          | 1:1000   | Rabbit |
| <b>PCNA</b>                  | CST                               | WB          | 1:1000   | Rabbit |
| <b>Snail</b>                 | ABcolonal                         | WB          | 1:1000   | Rabbit |
| <b>E-cadherin</b>            | CST                               | WB          | 1:1000   | Rabbit |
| <b>Vimentin</b>              | Wanleibio                         | WB          | 1:1000   | Rabbit |
| <b>TrkA</b>                  | CST                               | WB          | 1:1000   | Rabbit |
| <b>β-actin</b>               | ProteinTech                       | WB          | 1:1000   | Rabbit |
| <b>Flag</b>                  | ProteinTech                       | WB          | 1:1000   | Rabbit |
|                              | Abcam                             | Co-IP       | 1:100    | Rabbit |
|                              | CST                               | IF          | 1:100    | Mouse  |
|                              | ProteinTech                       | IF          | 1:100    | Rabbit |
| <b>Rab7</b>                  | ProteinTech                       | WB          | 1:1000   | Rabbit |
| <b>Rab5</b>                  | CST                               | IF          | 1:100    | Rabbit |
| <b>EEA1</b>                  | ProteinTech                       | IF          | 1:100    | Mouse  |
| <b>LAMP2</b>                 |                                   | WB          | 1:500    | Rabbit |
|                              |                                   | IF          | 1:100    | Mouse  |
| <b>LAMP1</b>                 | CST                               | IF          | 1:200    | Mouse  |
| <b>GFAP</b>                  | ABcolonal                         | IF          | 1:100    | Rabbit |
