# Supplementary material for: SorCS3 promotes the internalization of p75NTR to inhibit GBM progression
Source: PubMed Central journal article supplement (PMC8989992; doi:10.1038/s41419-022-04753-5), 2022-04-07
Supplement: 41419_2022_4753_MOESM7_ESM.pdf [file 41419_2022_4753_MOESM7_ESM.pdf]

# The original data of Western blots

Figure2-A

U87MG

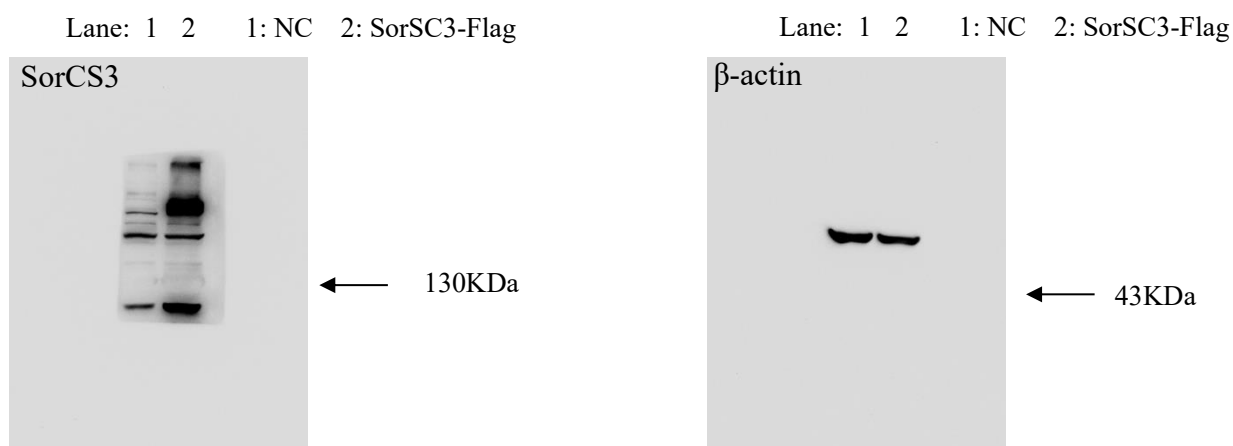

U251

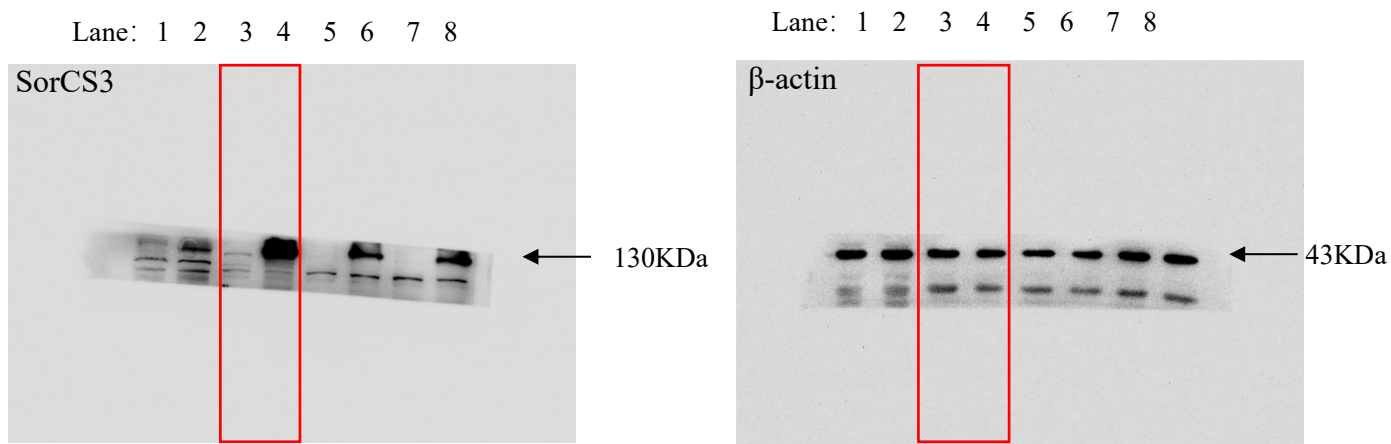

Lane

1: NC 2: SorSC3-Flag 3: NC 4: SorSC3-Flag 5: NC 6: SorSC3-Flag 7: NC 8: SorSC3-Flag

Figure2-J

U87MG

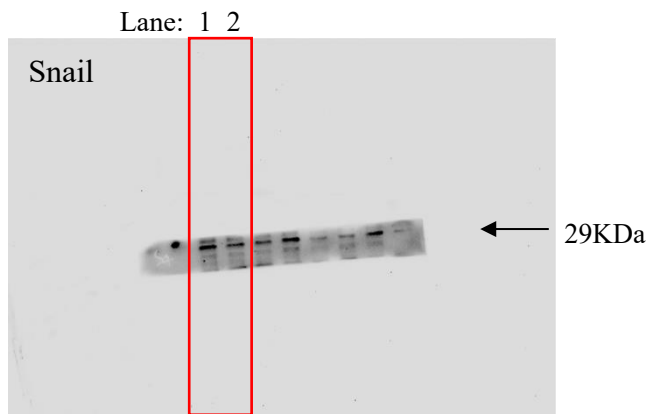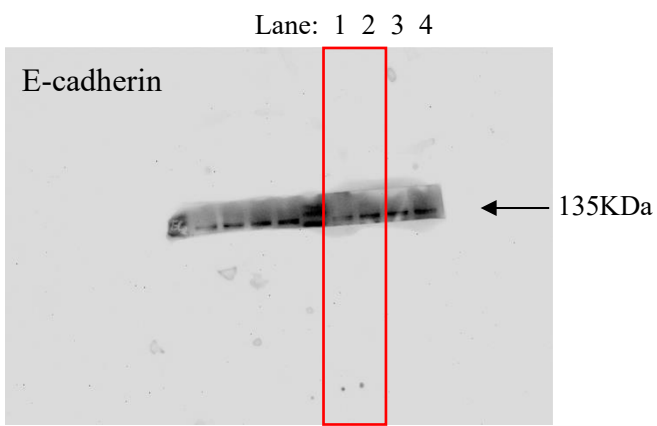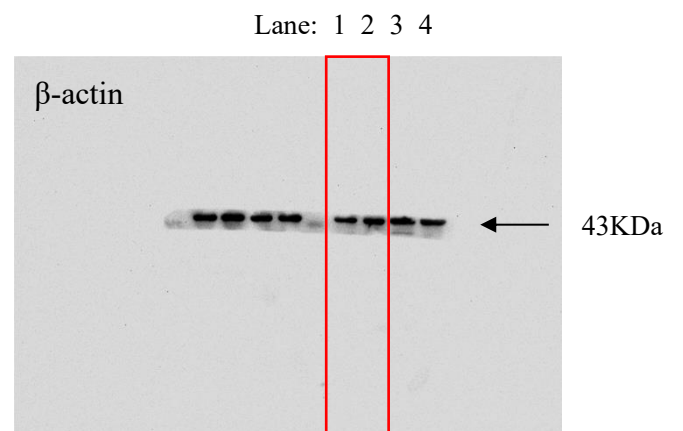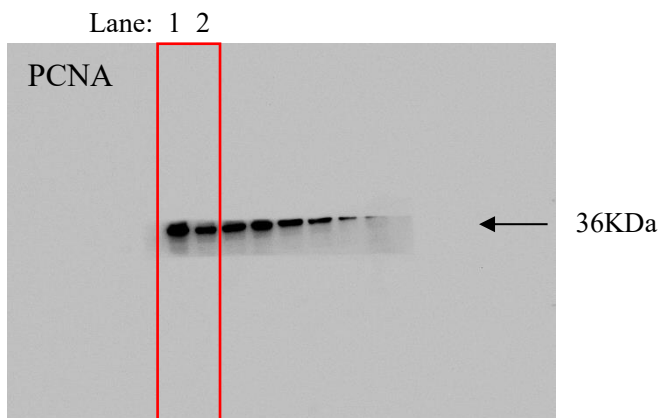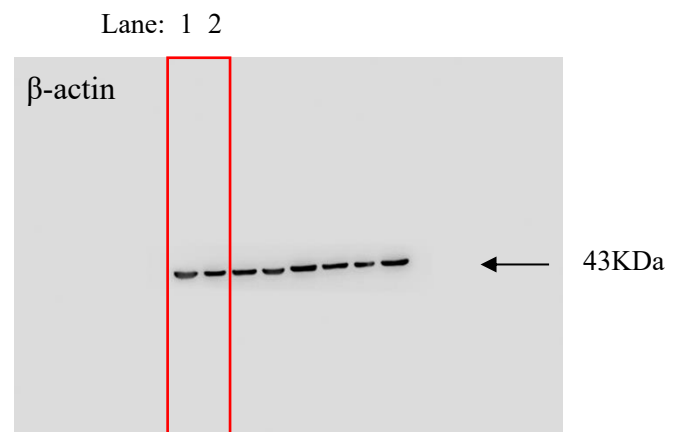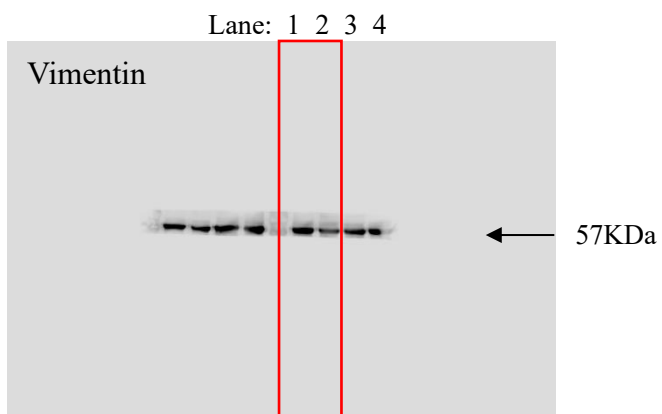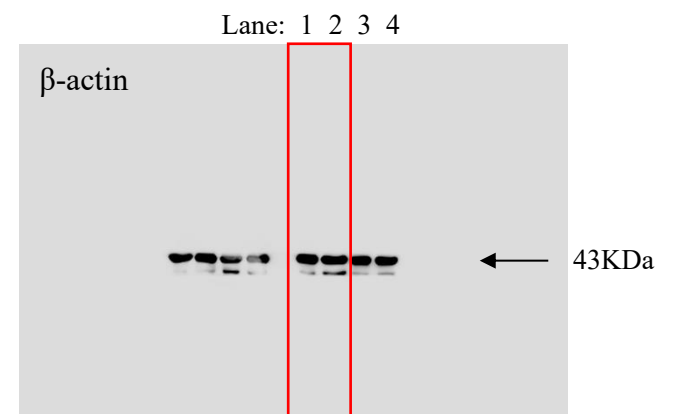

Lane: 1: NC 2: SorSC3-Flag

# Figure2-J

U251

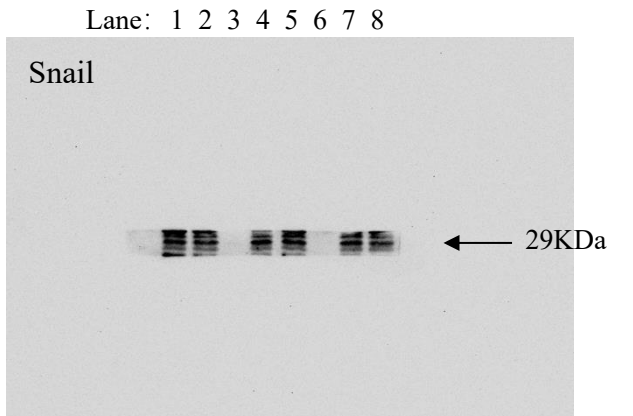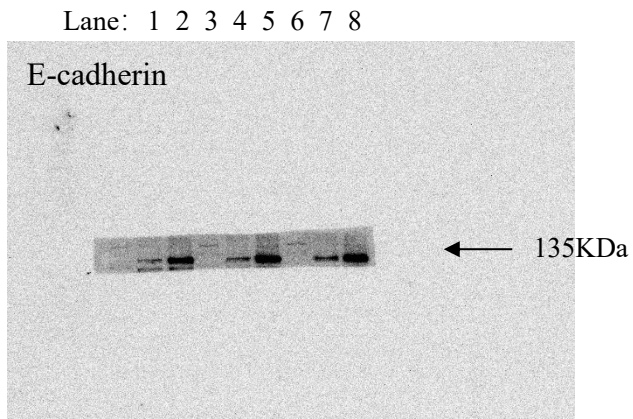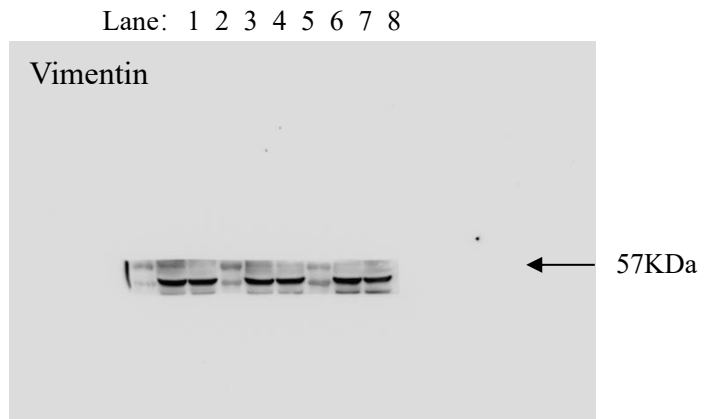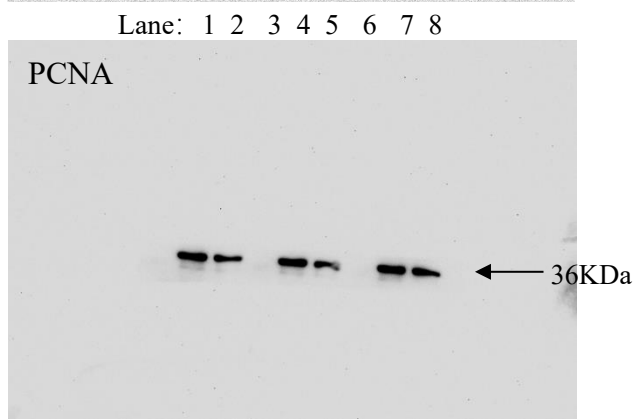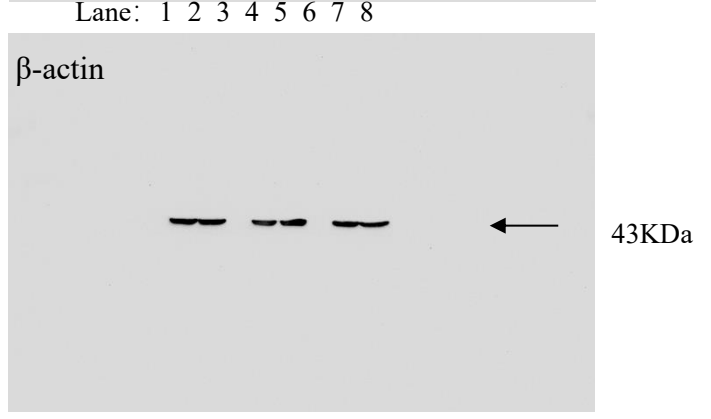

Lane

1: NC 2: OE-SorSC3 3: Marker 4: NC 5: OE-SorSC3 6: Marker 7: NC 8: OE-SorSC3

# Figure3-B

## U87MG

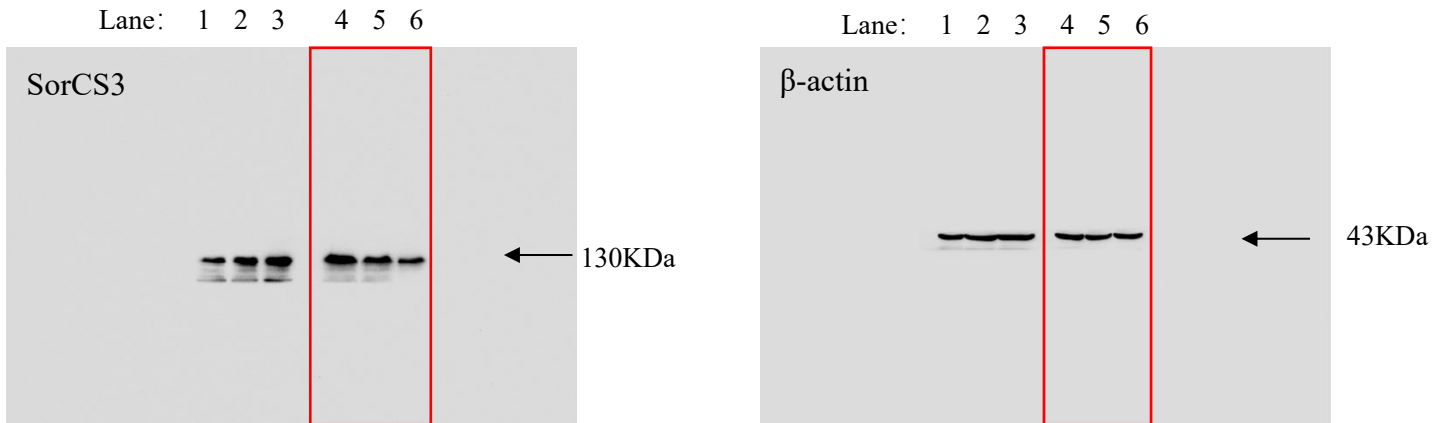

Lane

1: si-SorCS3-2# 2: si-SorCS3-1# 3: NC 4: NC 5: si-SorCS3-1# 6: si-SorCS3-2#

## U251

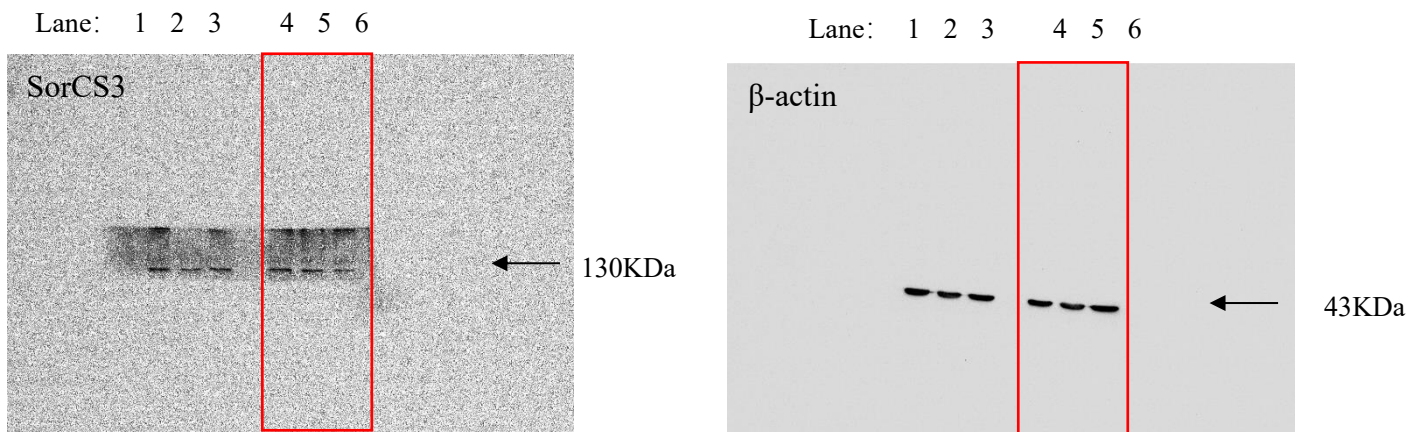

Lane

1 NC 2: si-SorCS3-1# 3: si-SorCS3-2# 4: NC 5: si-SorCS3-1# 6: si-SorCS3-2#

Figure3-I

U87MG

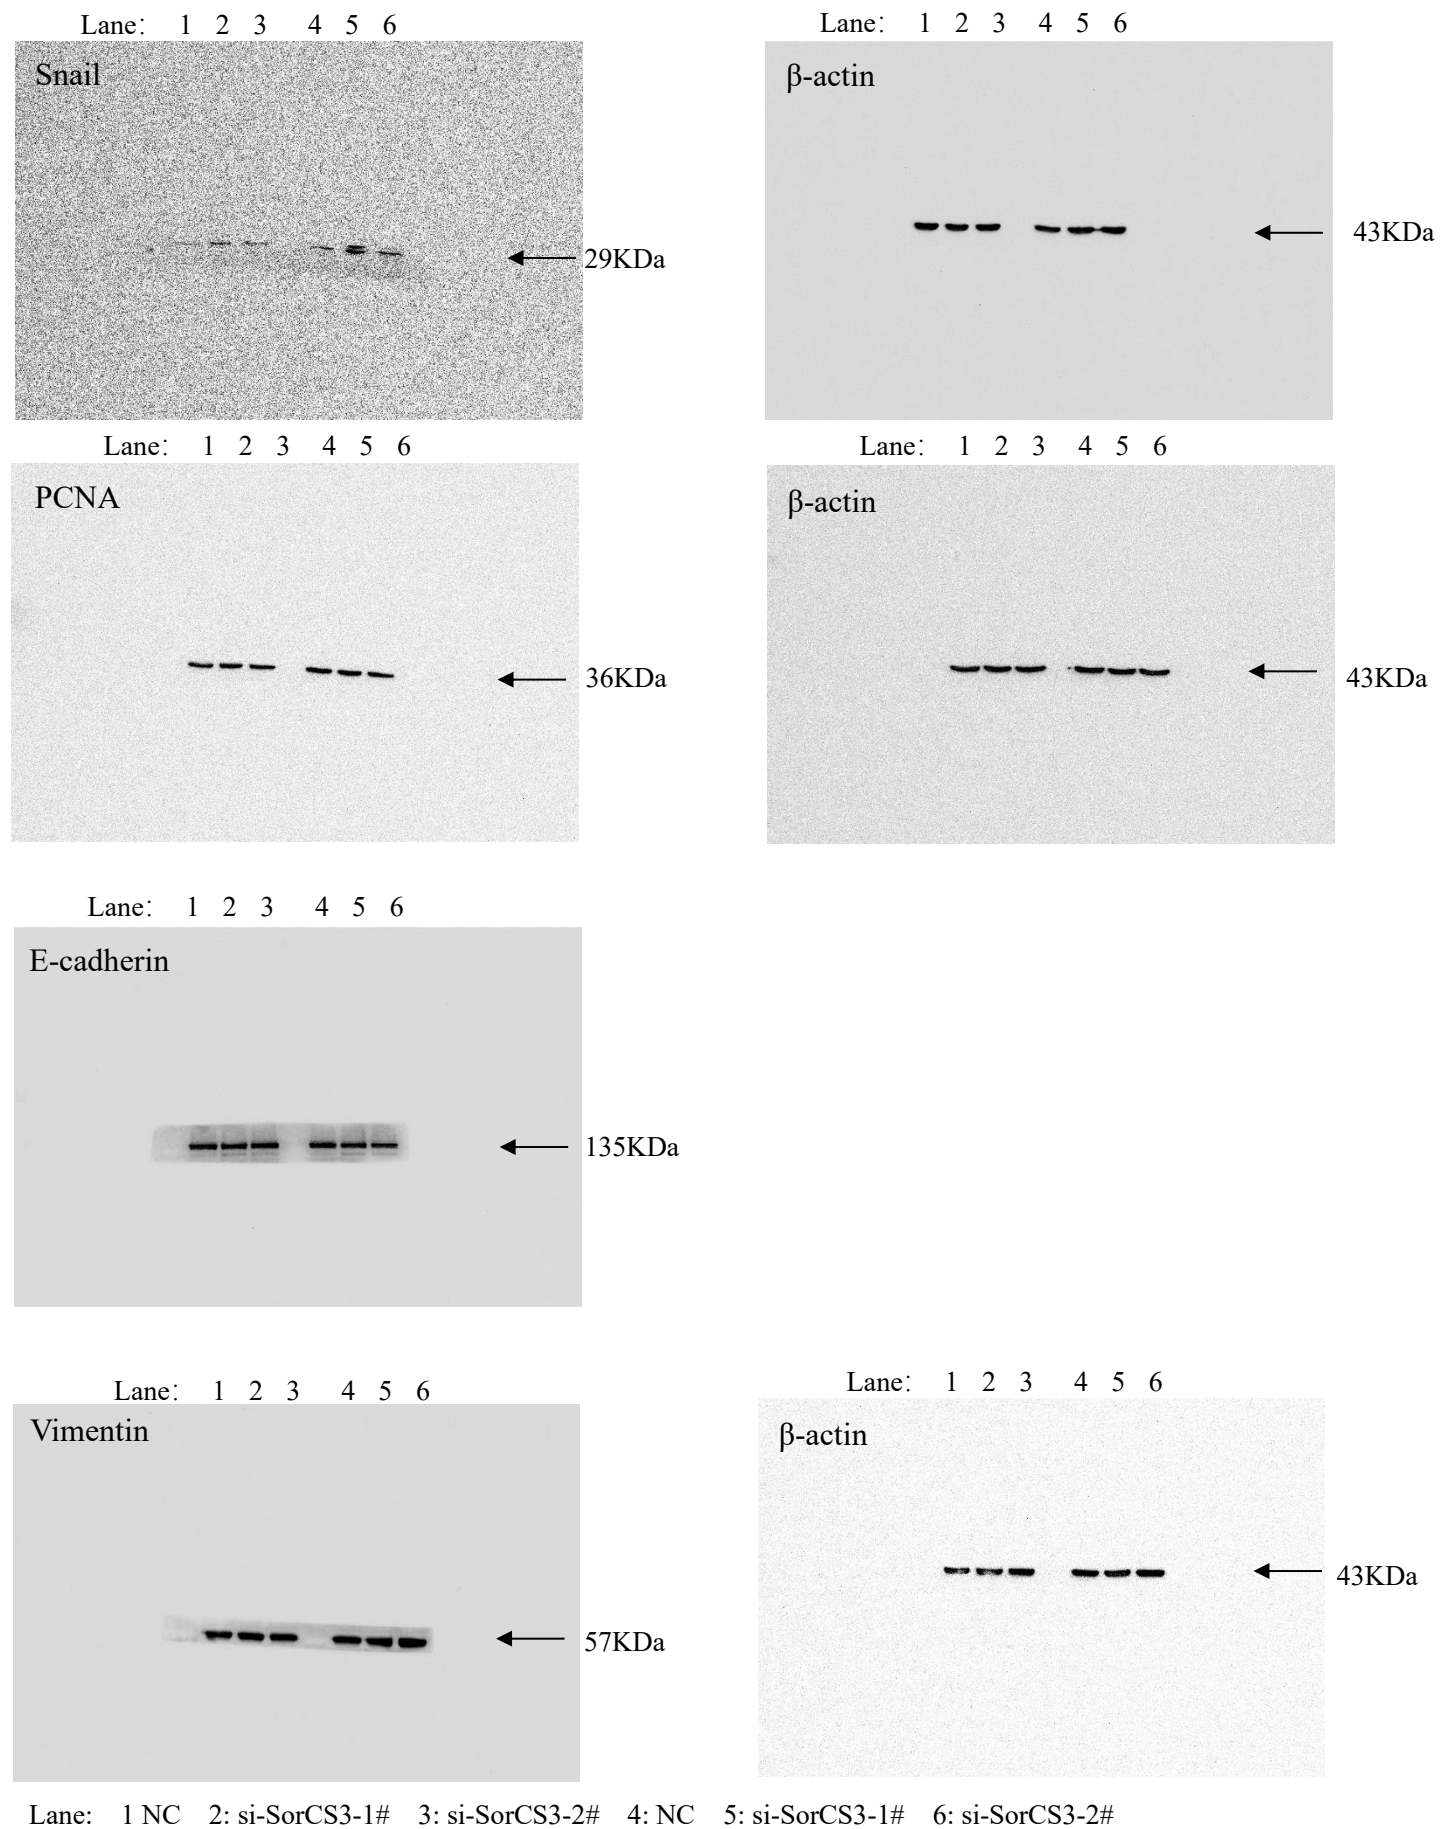

Lane: 1 NC 2: si-SorCS3-1# 3: si-SorCS3-2# 4: NC 5: si-SorCS3-1# 6: si-SorCS3-2#

Figure3-I

U251

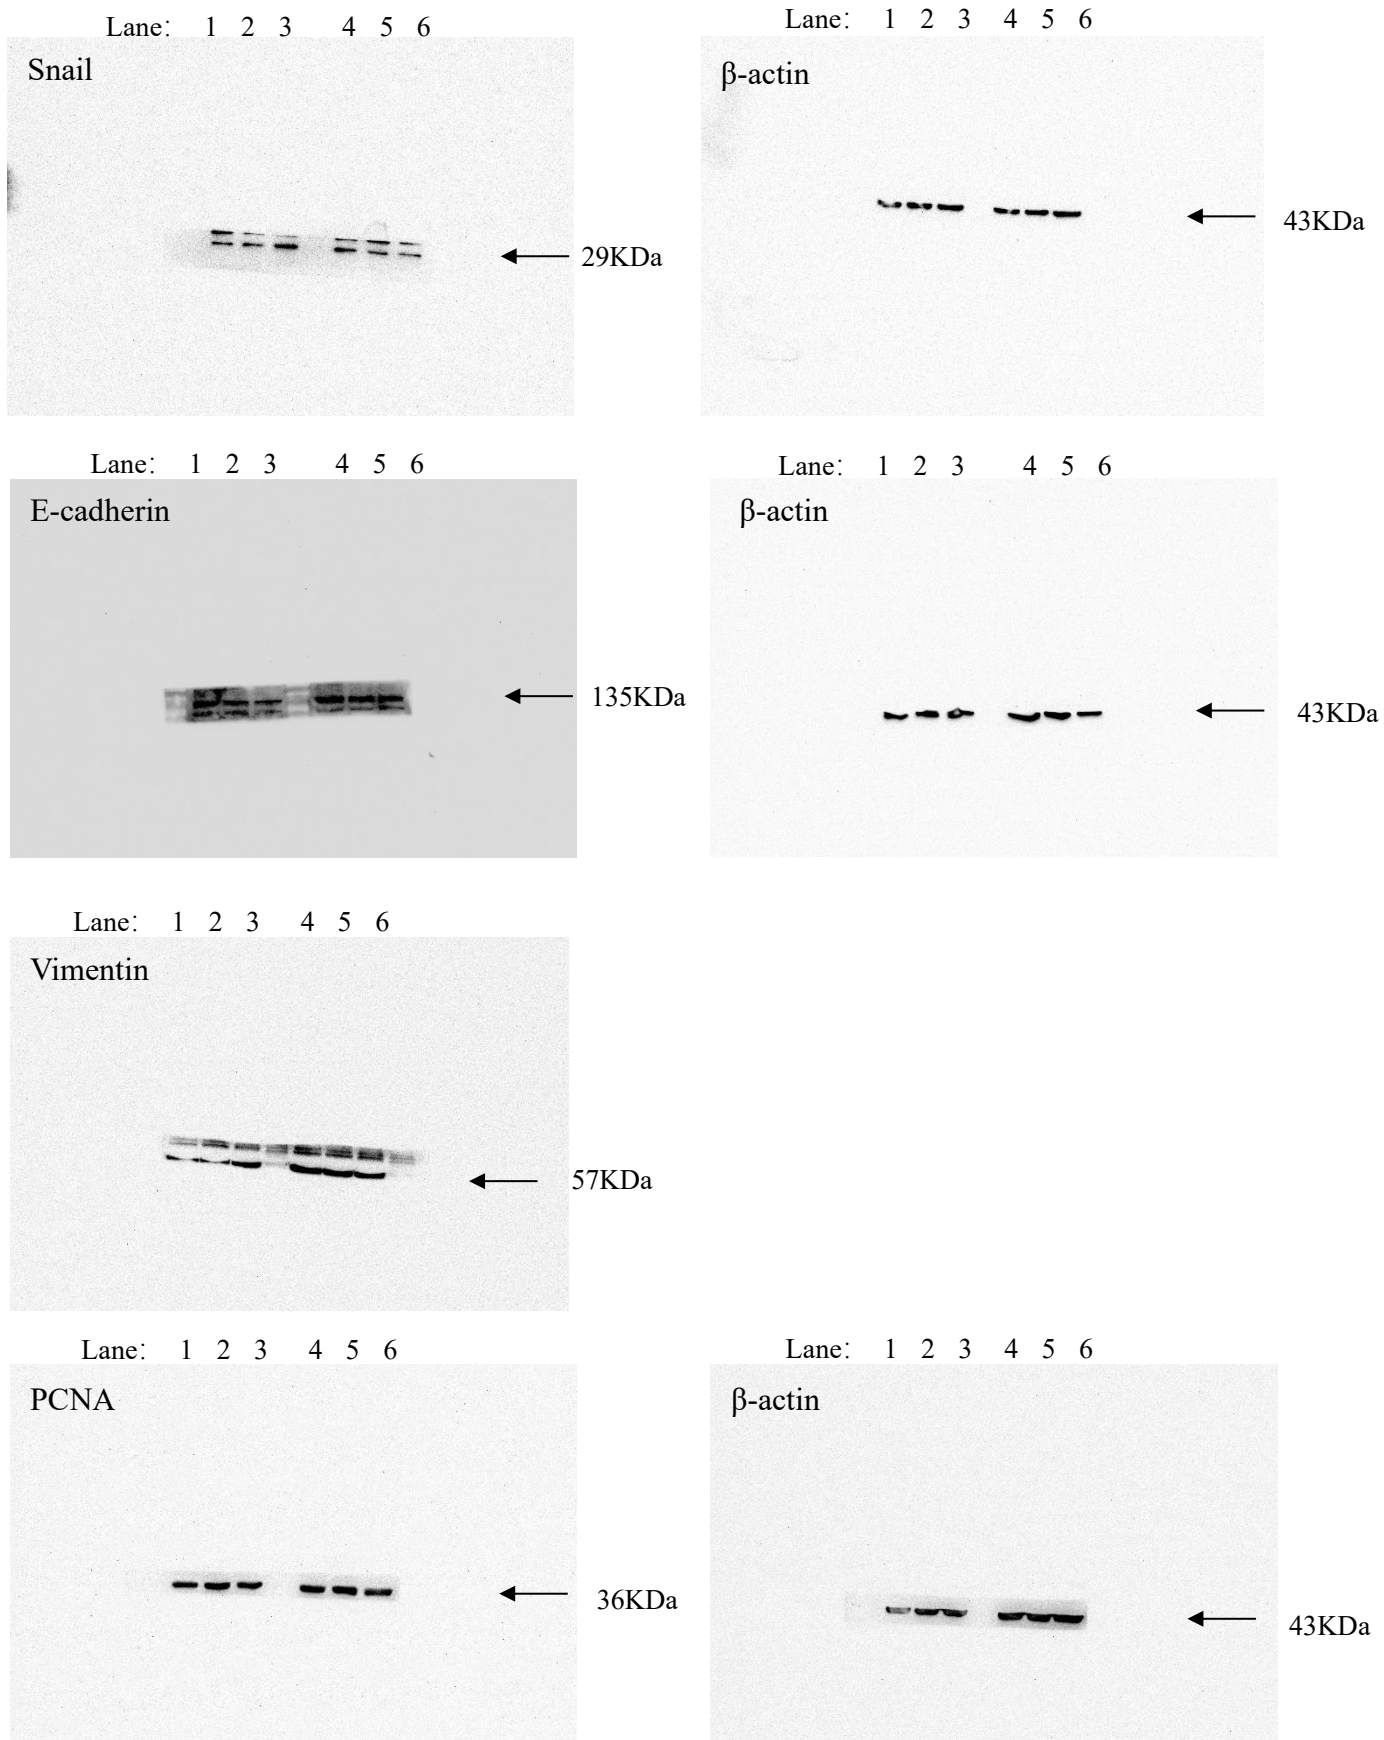

Lane: 1 NC 2: si-SorCS3-1# 3: si-SorCS3-2# 4: NC 5: si-SorCS3-1# 6: si-SorCS3-2#

Figure4-B

U87MG

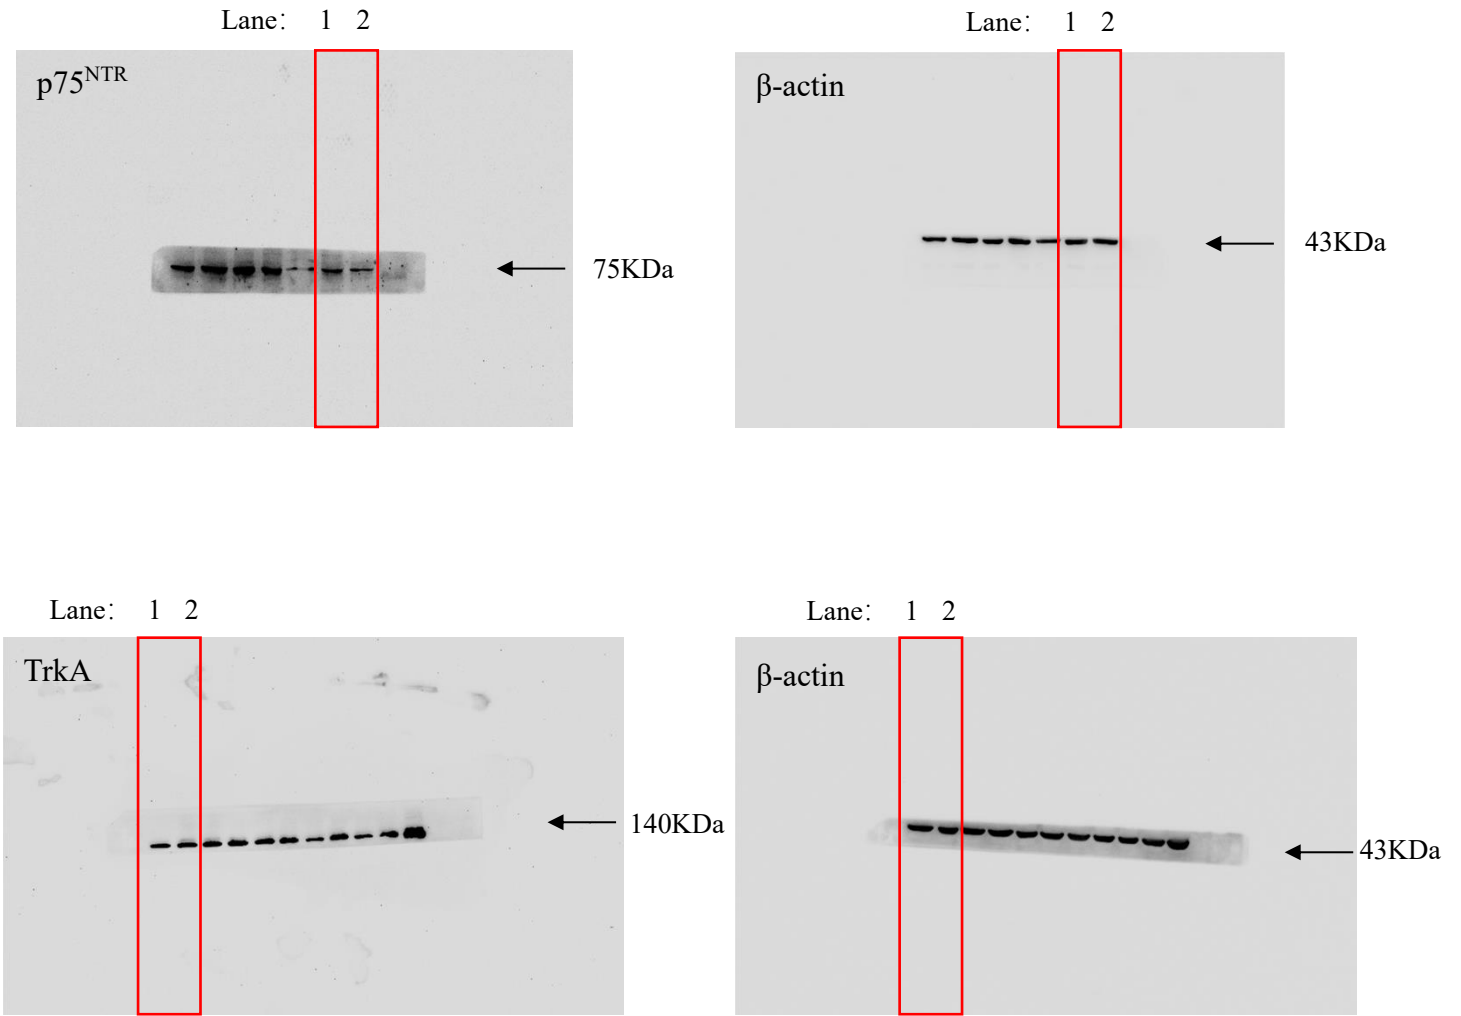

Lane: 1: NC 2: OE-SorSC3

Figure4-B

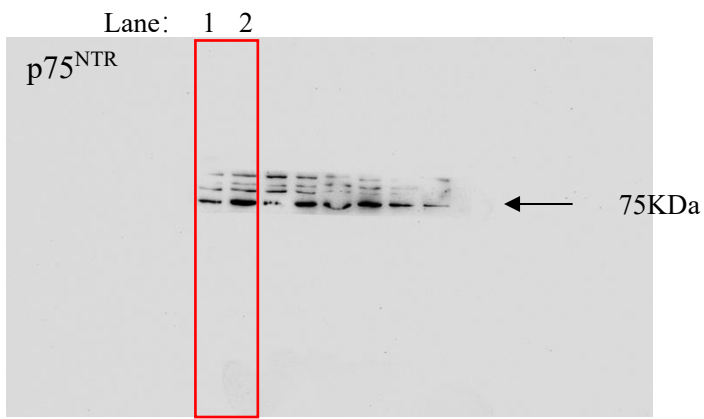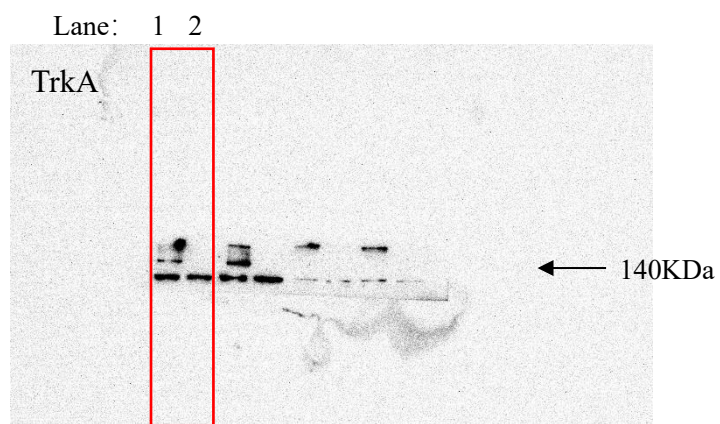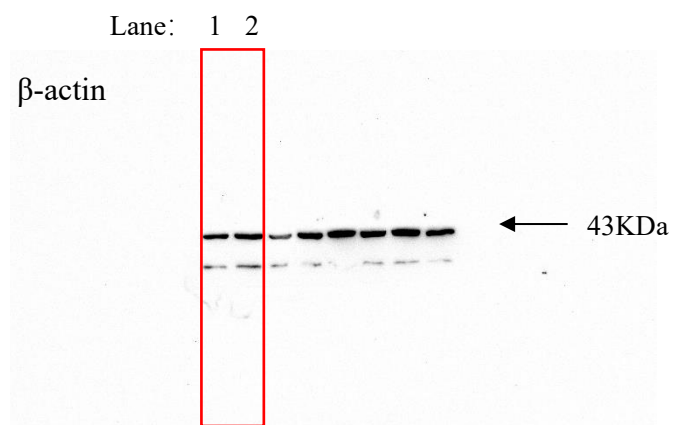

Lane: 1: NC 2: si-SorSC3-2#



# Figure4-G Co-IP

Lane: 1 2 3 4 5 6

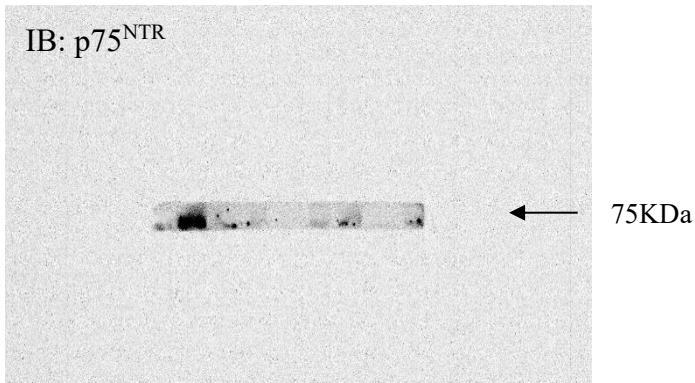

IP Lane:

1: IgG

2: SorCS3-Flag

3: SorCS3-Flag

4: wash-1

5: wash-2

6: wash-3

Lane: 1 2 3 4 5 6

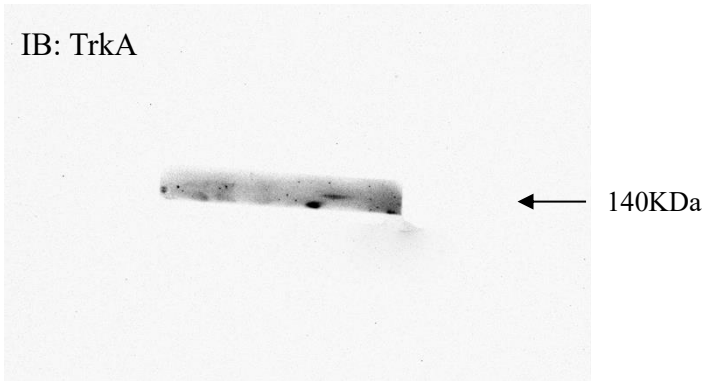

Lane: 1: OE-SorSC3 2: NC 3: OE-SorCS3

Lane: 1 2 3 4 5 6 7 8

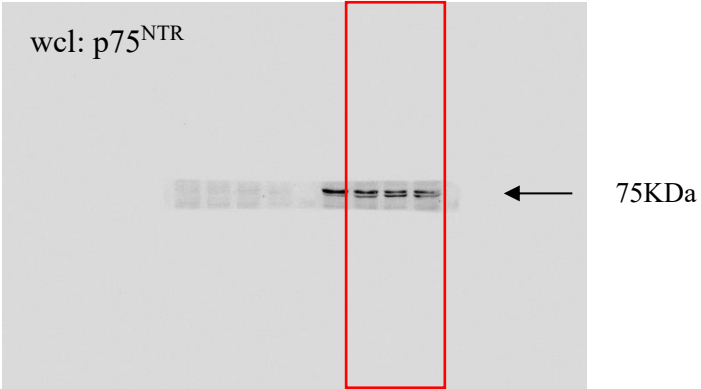

Lane: 1 2 3 4 5 6 7 8

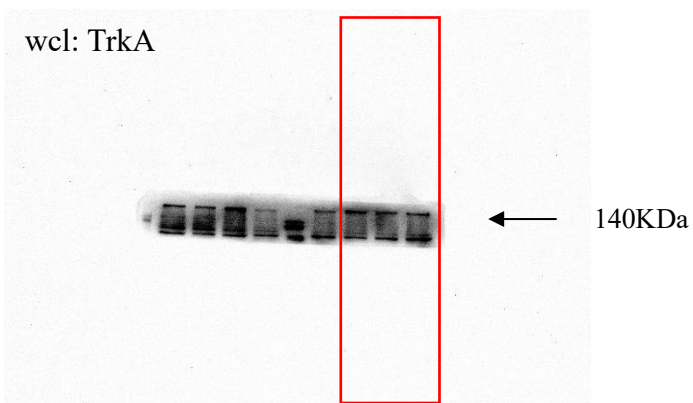

Lane: 1 2 3 4 5 6 7 8

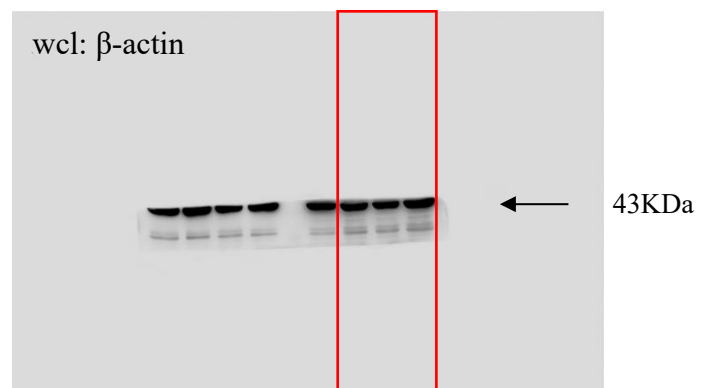

Lane: 5: NC 6: OE-SorSC3 7: NC 8: OE-SorCS3

# Figure4-H Co-IP

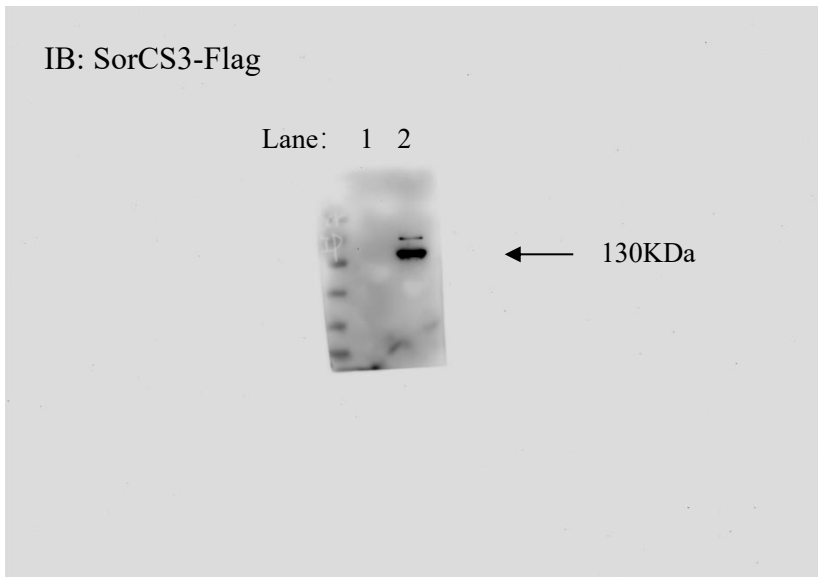

IP Lane:  
1: IgG  
2: p75<sup>NTR</sup>

Lane: 1, 2: OE-SorCS3

---

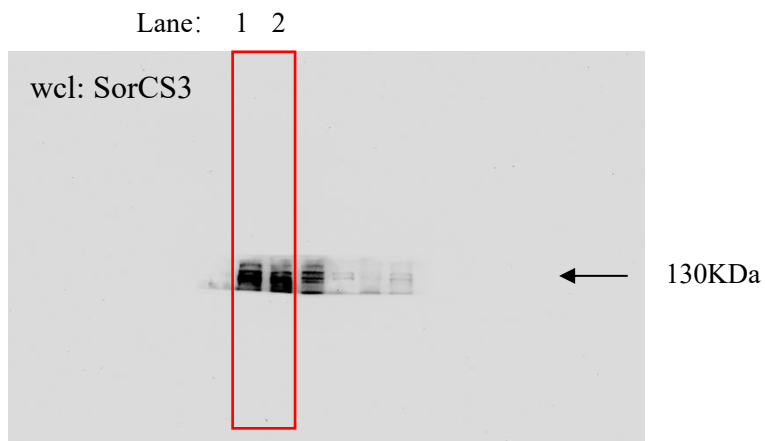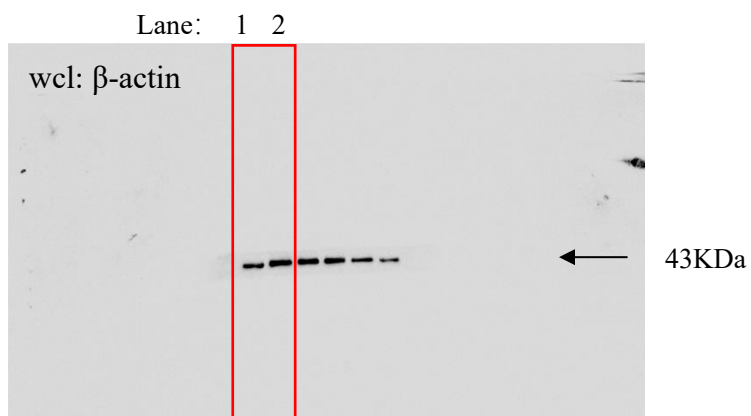

Lane: 1, 2: OE-SorSC3

# Figure5-A Co-IP

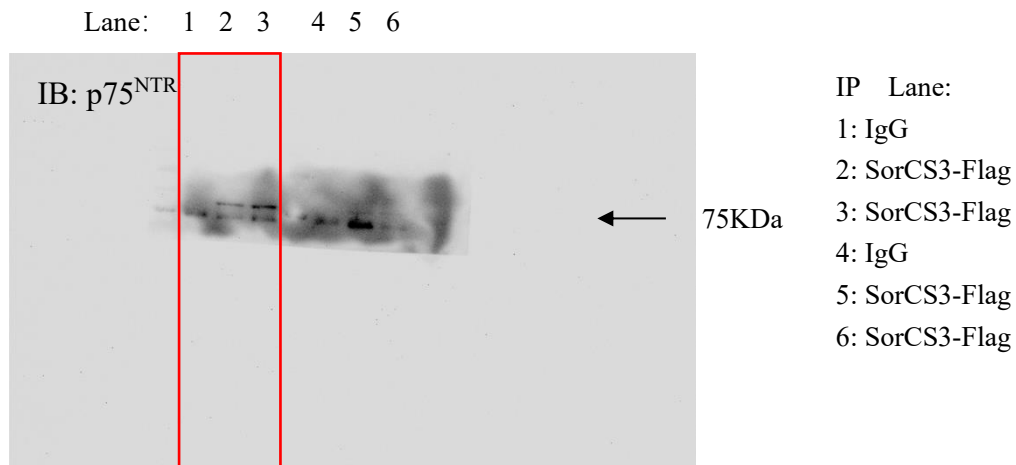

Lane: 1: OE-SorSC3 2: OE-SorCS3 3: OE-SorCS3+NGF

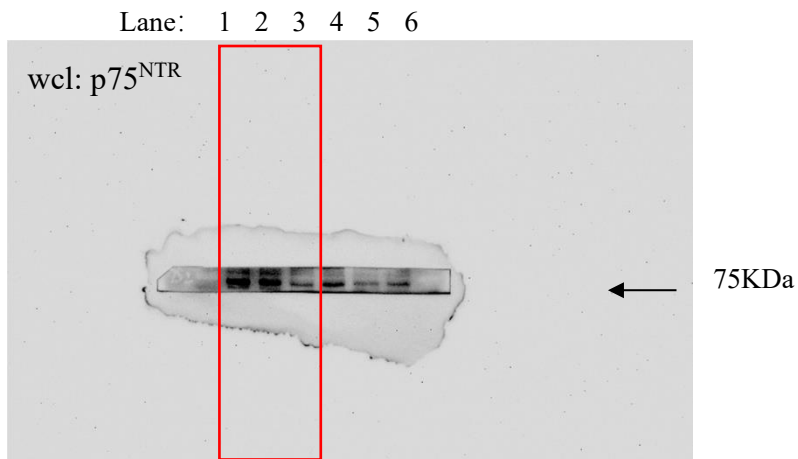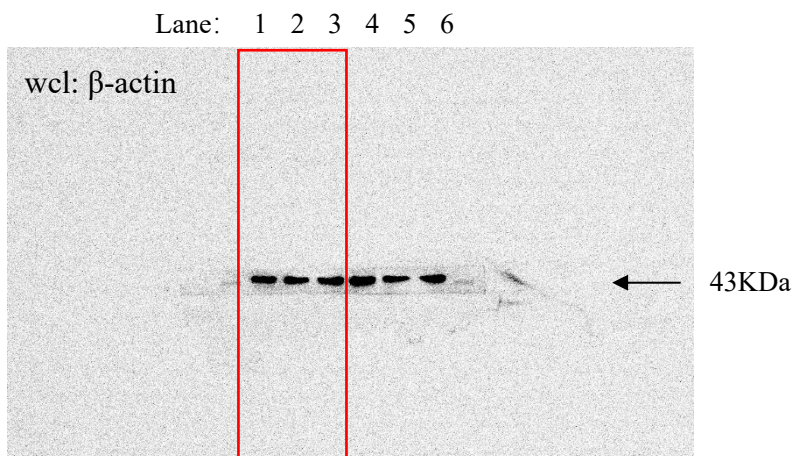

Lane: 1: OE-SorSC3 2: OE-SorCS3 3: OE-SorCS3+NGF

Figure5-B

p75<sup>NTR</sup>

Lane: 1 2 3 4 5 6 7 8 9 10 11 12

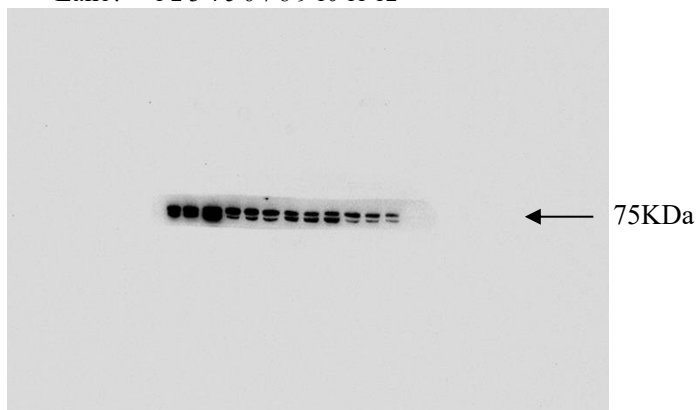

Lane:

- 1: NC+NGF(0 min)
- 2: NC+NGF(10 min)
- 3: NC+NGF(20 min)
- 4: NC+NGF(30 min)
- 5: NC+NGF(60 min)
- 6: NC+NGF(120 min)
- 7: OE-SorCS3+NGF(0 min)
- 8: OE-SorCS3+NGF(10 min)
- 9: OE-SorCS3+NGF(20 min)
- 10: OE-SorCS3+NGF(30 min)
- 11: OE-SorCS3+NGF(60 min)
- 12: OE-SorCS3+NGF(120 min)

Lane: 1 2 3 4 5 6 7 8 9 10 11 12

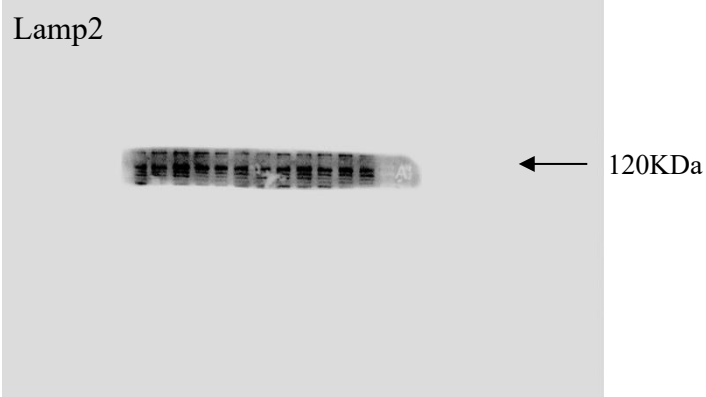

Lane: 1 2 3 4 5 6 7 8 9 10 11 12

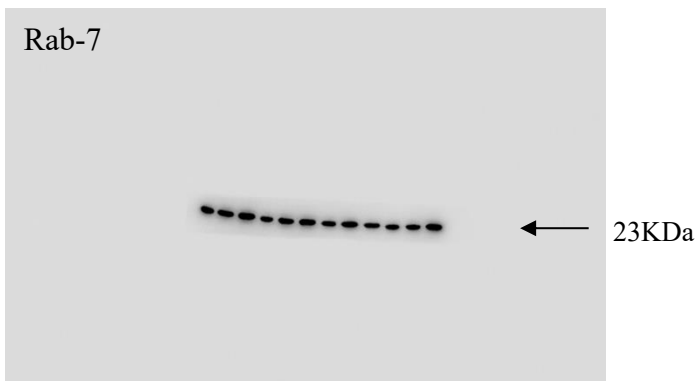

Lane: 1 2 3 4 5 6 7 8 9 10 11 12

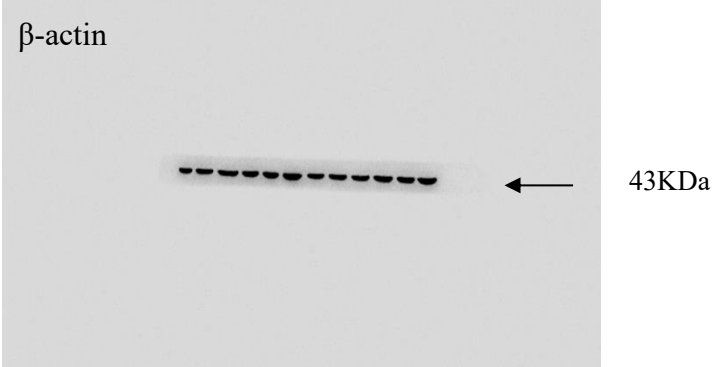

Figure5-G OE-SorCS3

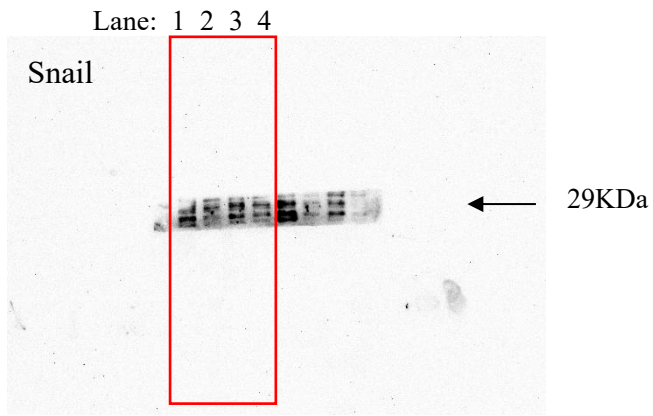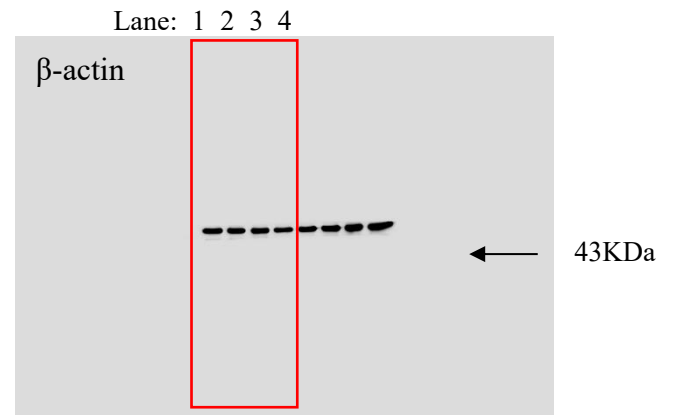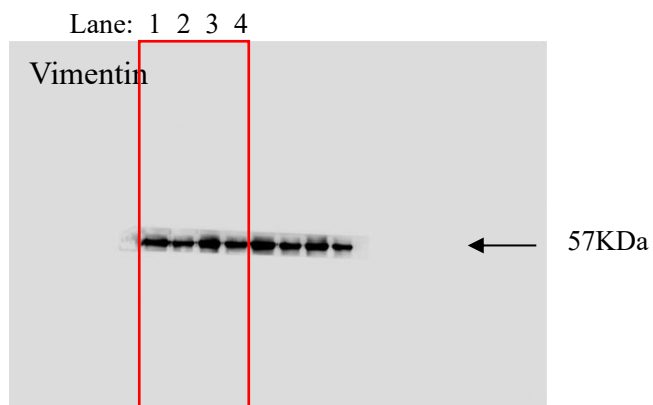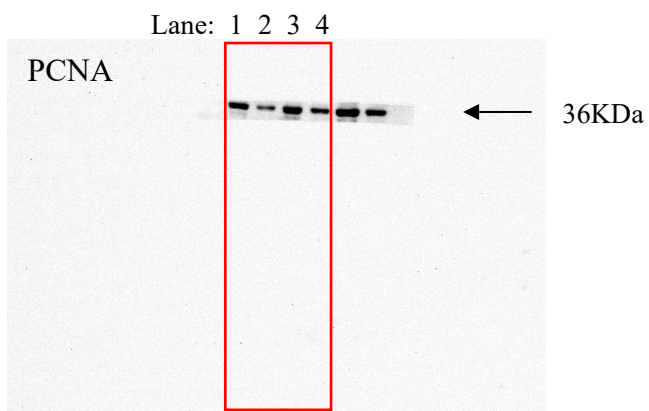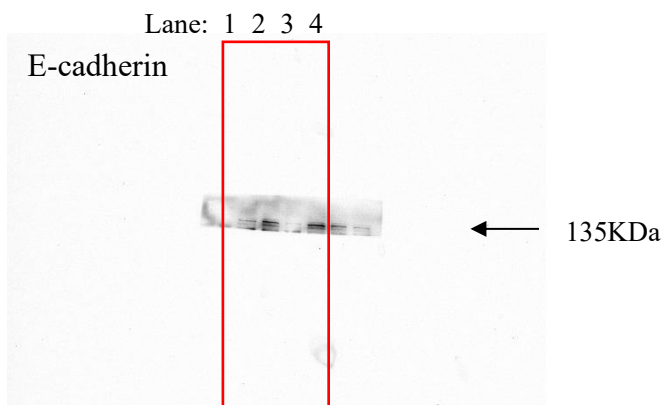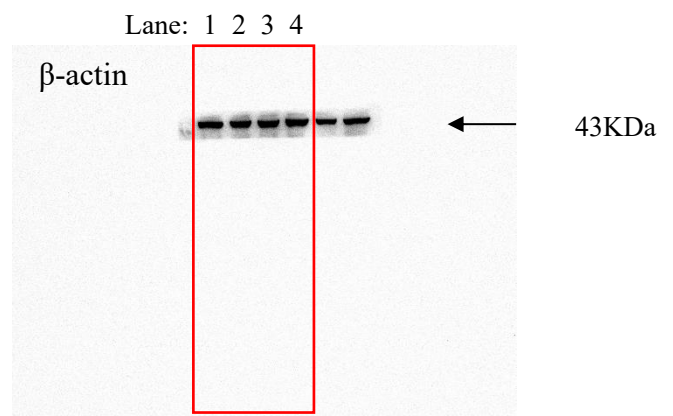

Lane: 1: NC 2: OE-SorCS3 3: NC+NGF 4: OE-SorCS3+NGF

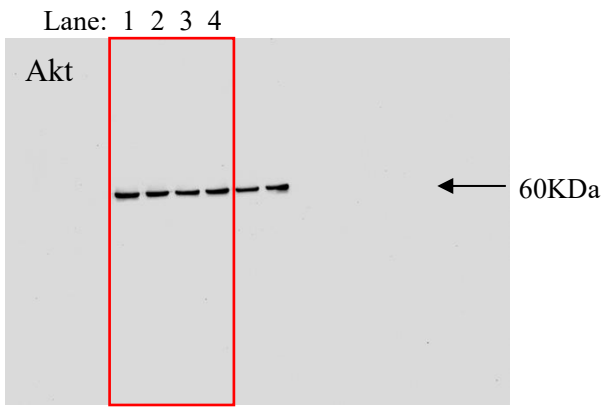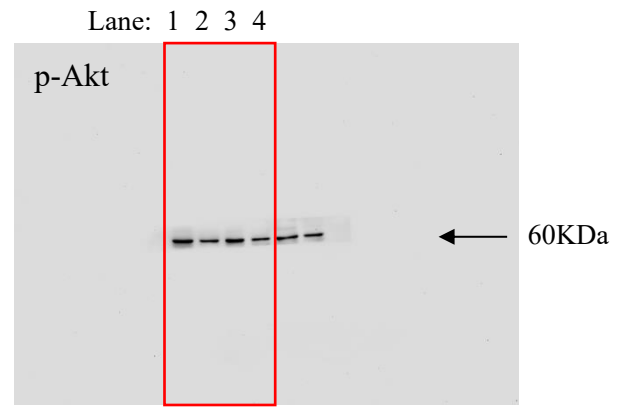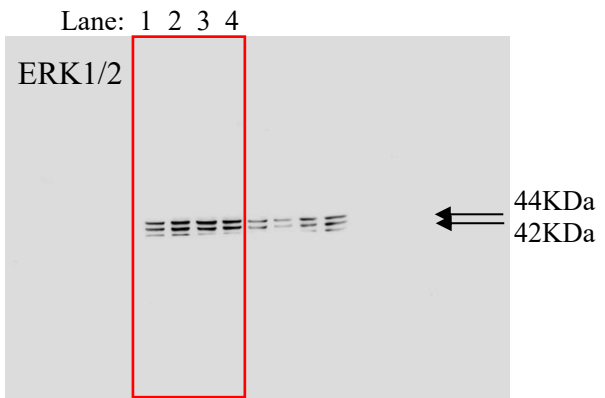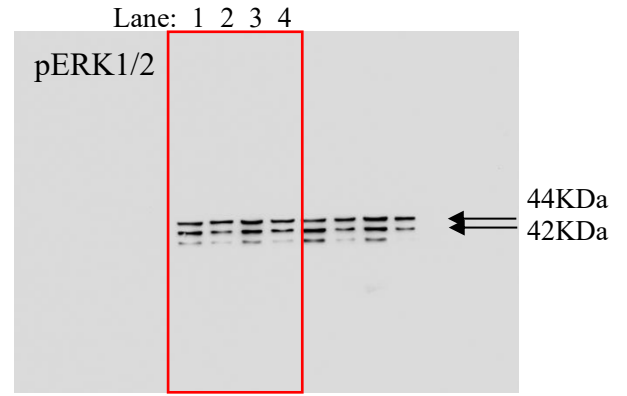

Lane: 1: NC 2: OE-SorCS3 3: NC+NGF 4: OE-SorCS3+NGF

Figure5-G si-SorCS3

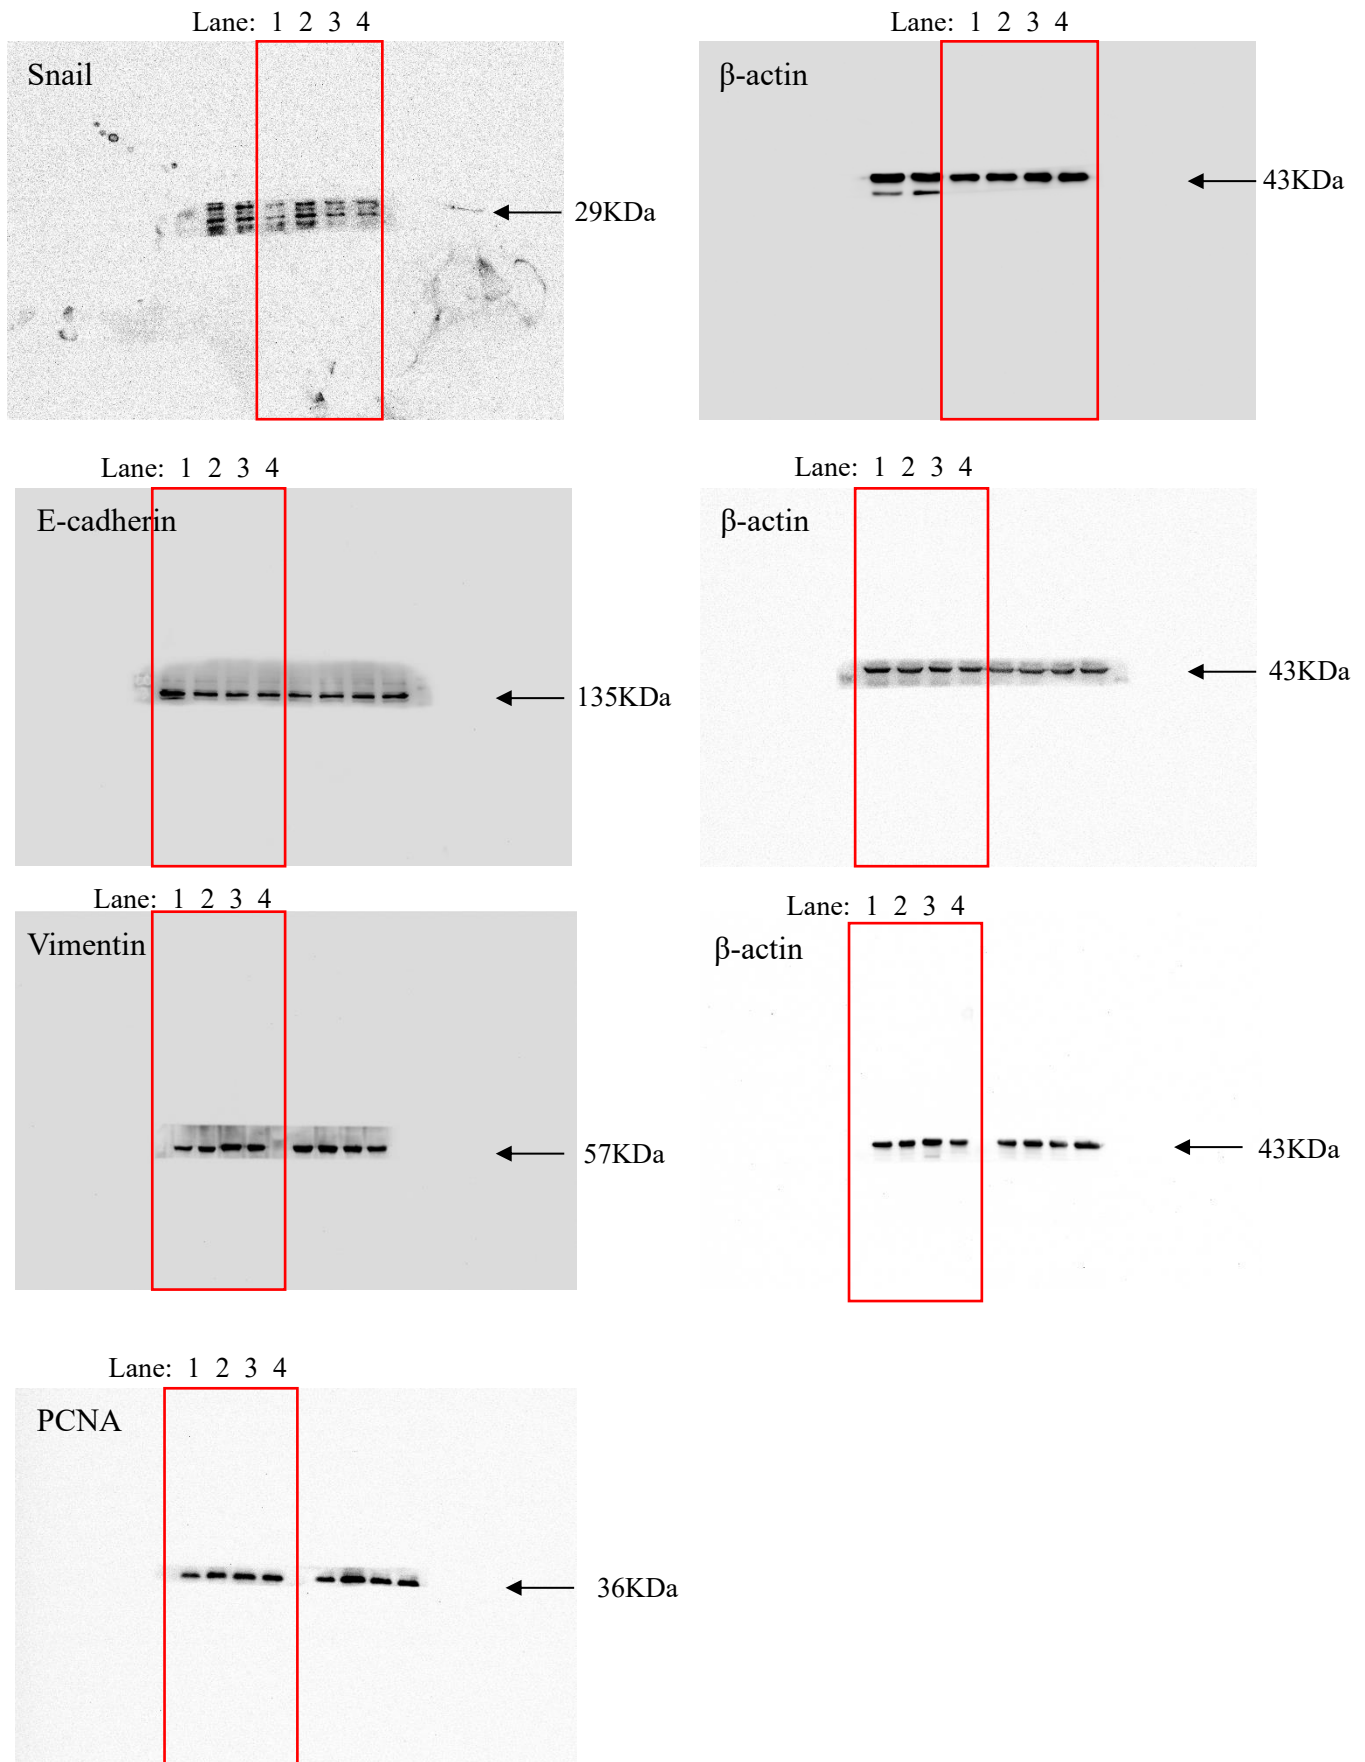

Lane: 1: NC 2: OE-SorCS3 3: NC+NGF 4: OE-SorCS3+NGF

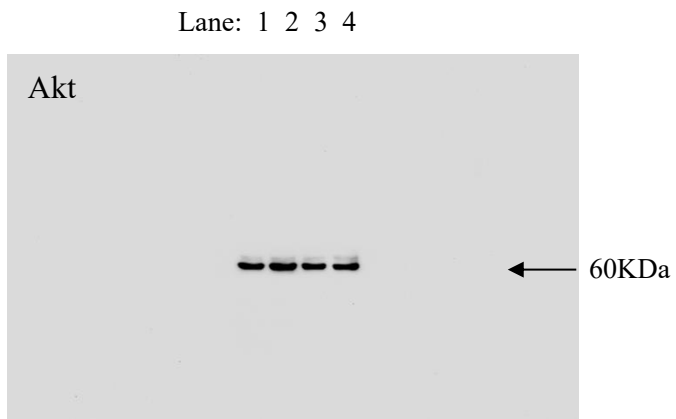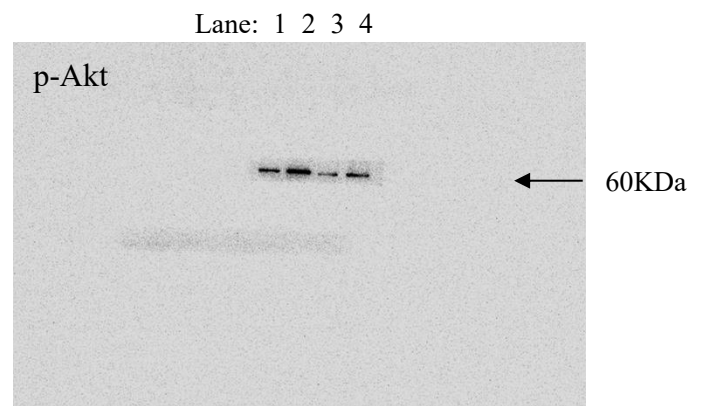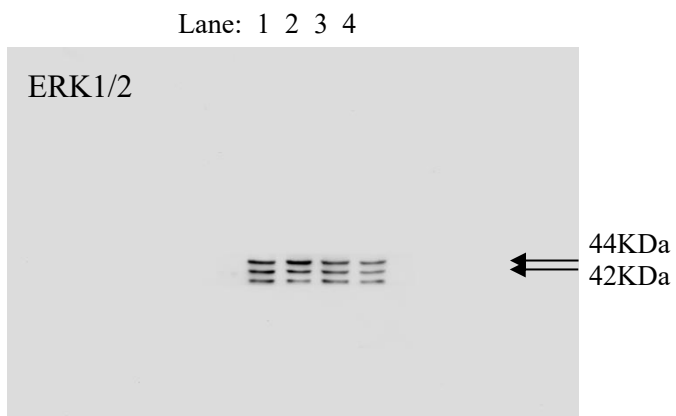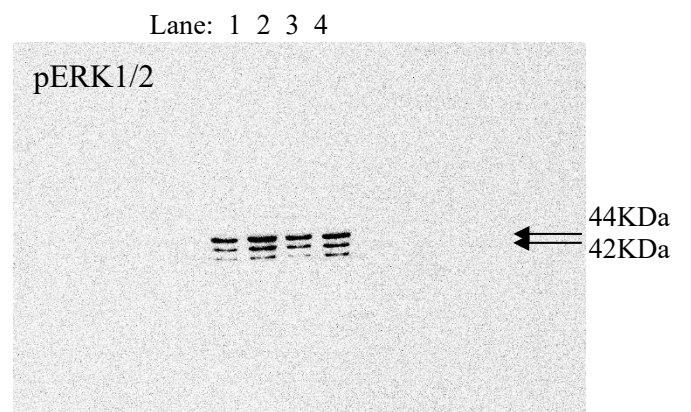

Lane: 1: NC 2: OE-SorCS3 3: NC+NGF 4: OE-SorCS3+NGF



Figure6-F

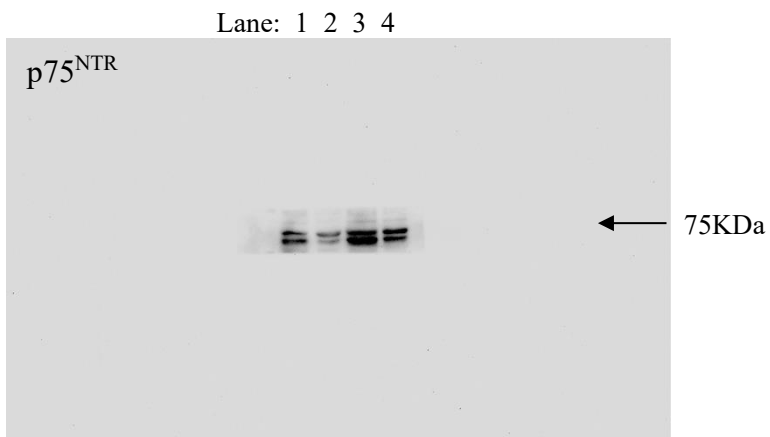

Lane:

1: NC+NGF+DMSO

2: OE-SorSC3+NGF+DMSO

3: NC+NGF+Dynasore

4: OE-SorCS3+NGF+Dynasore

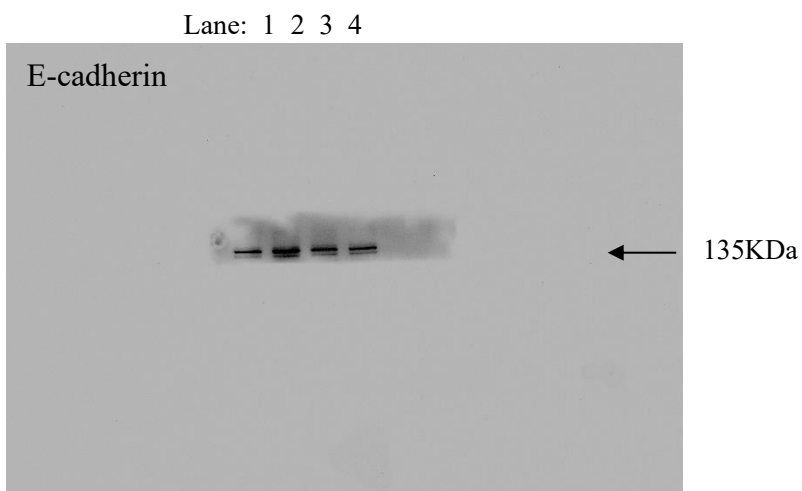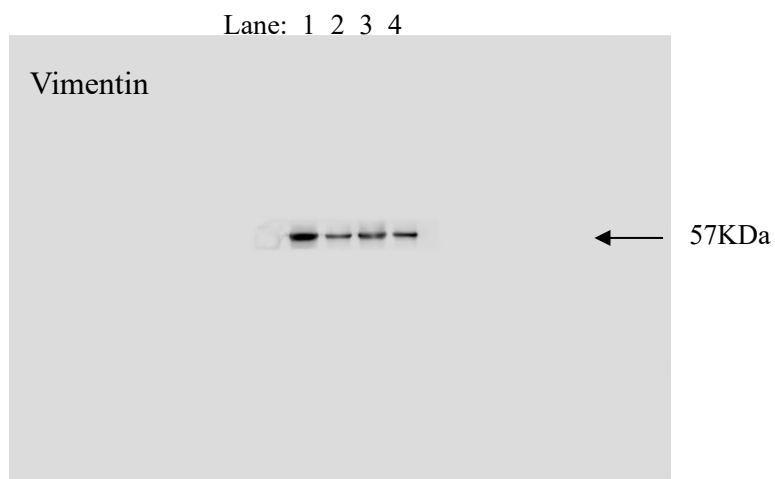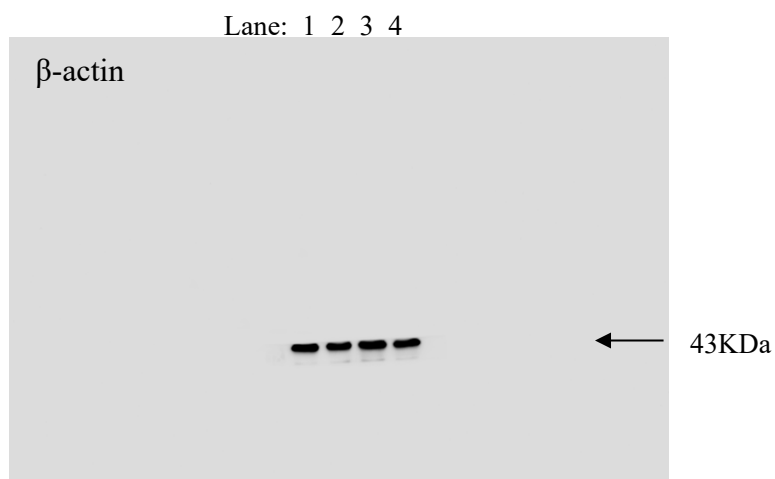

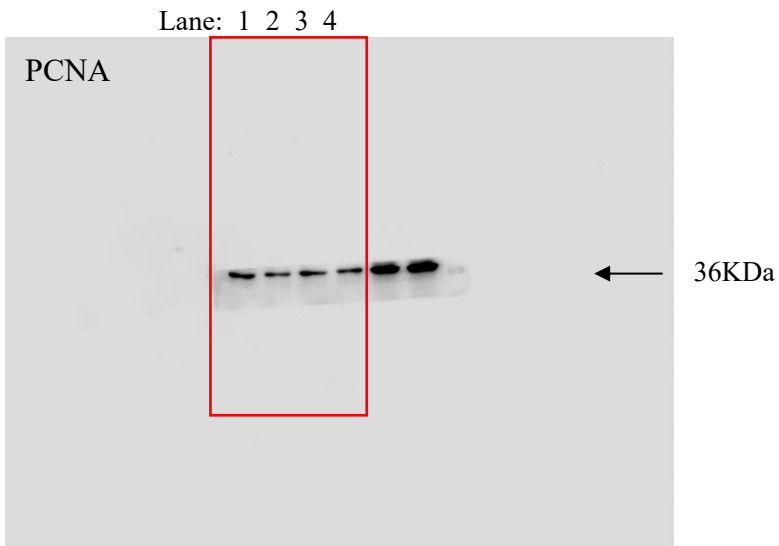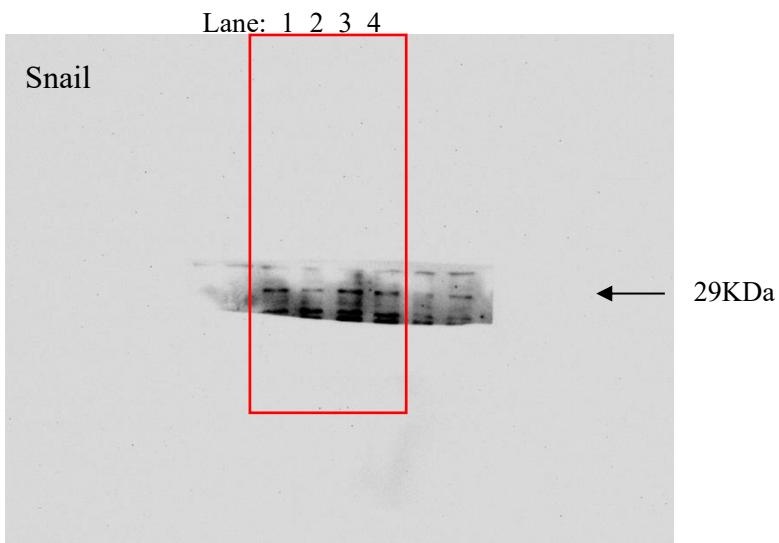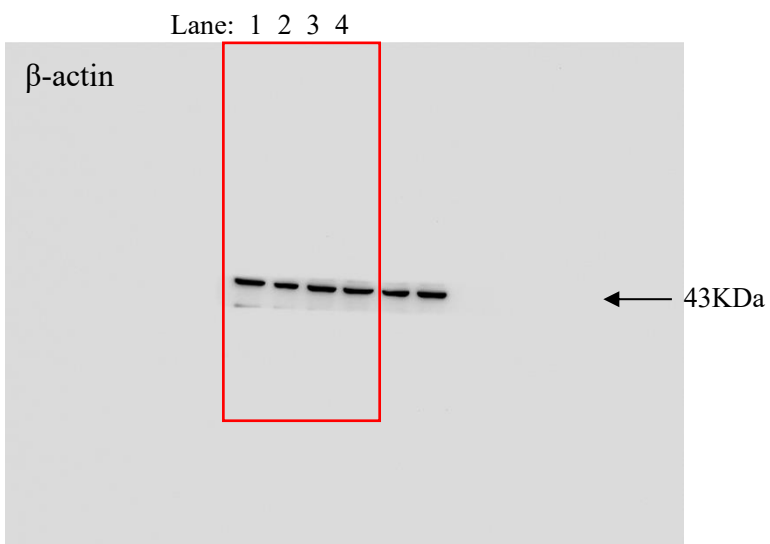

Lane: 1: NC+NGF+DMSO 2: OE-SorSC3+NGF+DMSO 3: NC+NGF+Dynasore 4: OE-SorCS3+ NGF+Dynasore

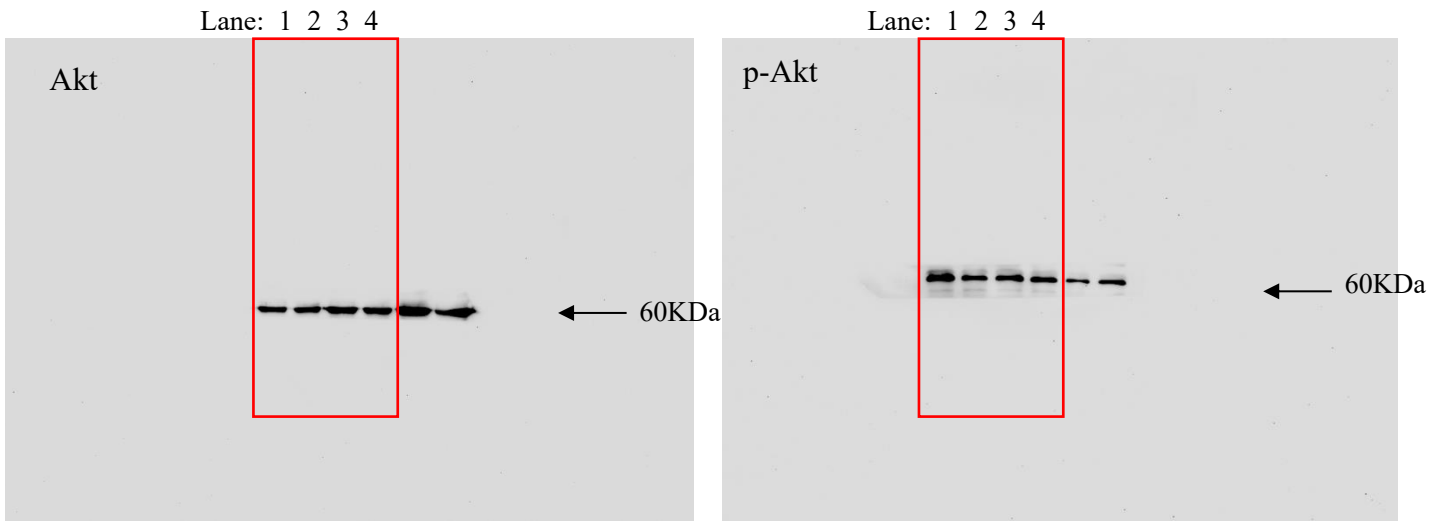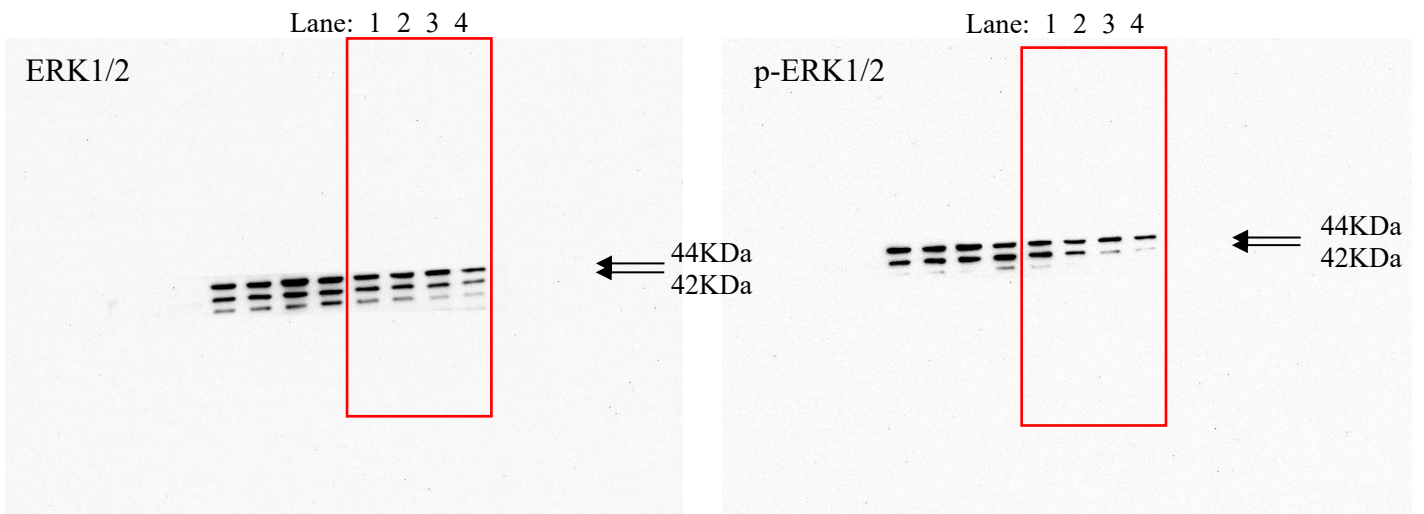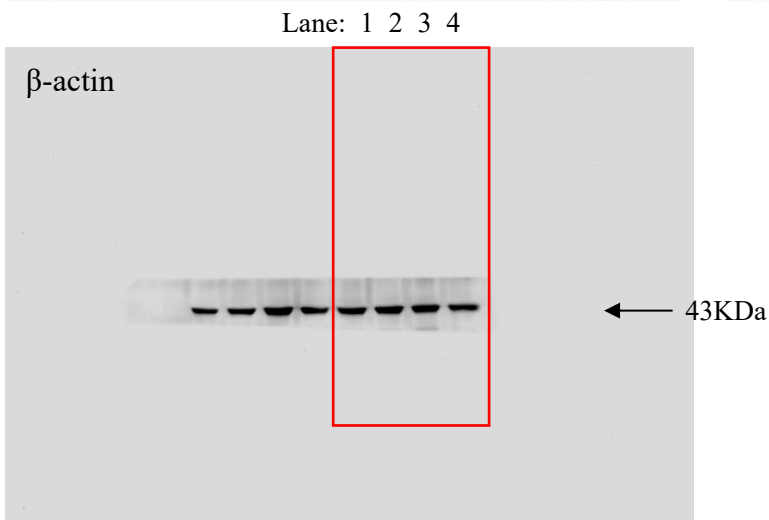

Lane: 1: NC+NGF+DMSO 2: OE-SorSC3+NGF+DMSO 3: NC+NGF+Dynasore 4: OE-SorCS3+ NGF+Dynasore

Figure6-I

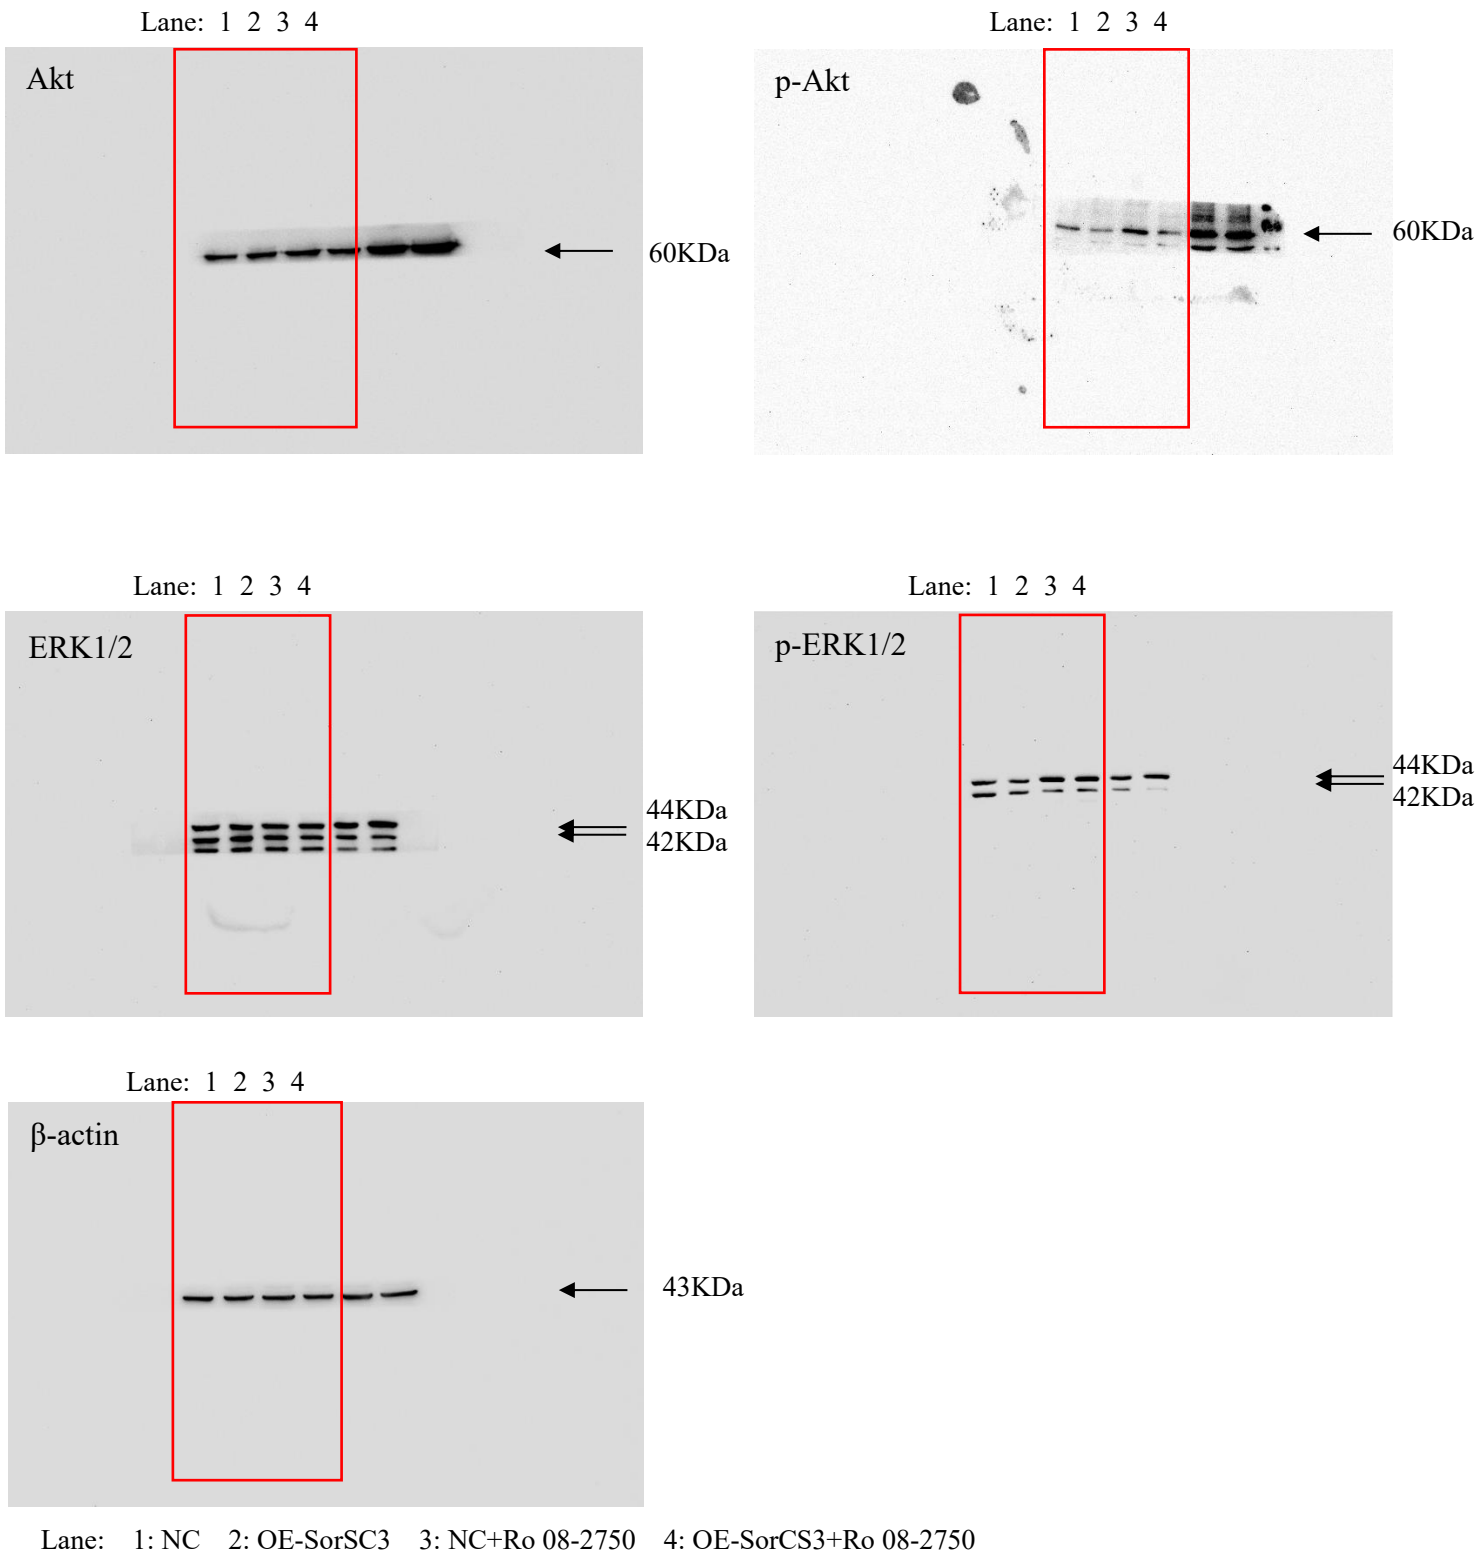

# Supplementary Figure1-A

Lane: 1 2 3 4

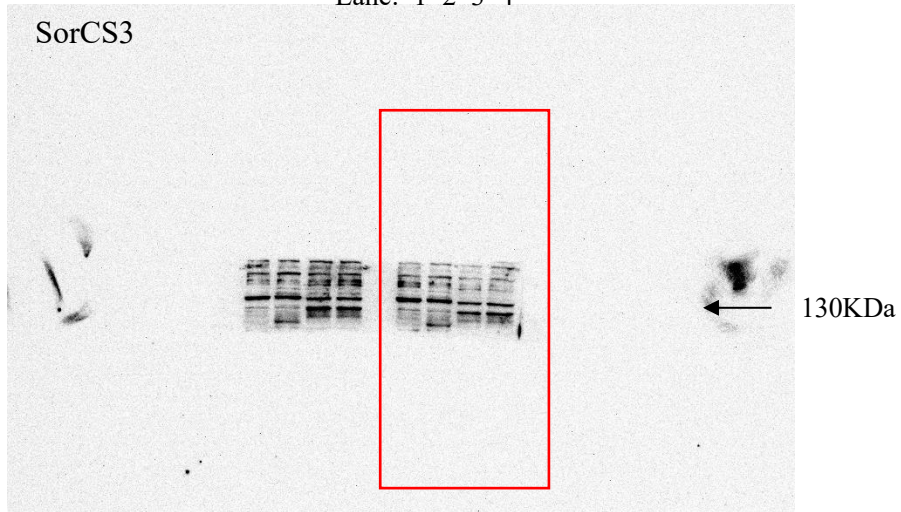

Lane: 1 2 3 4

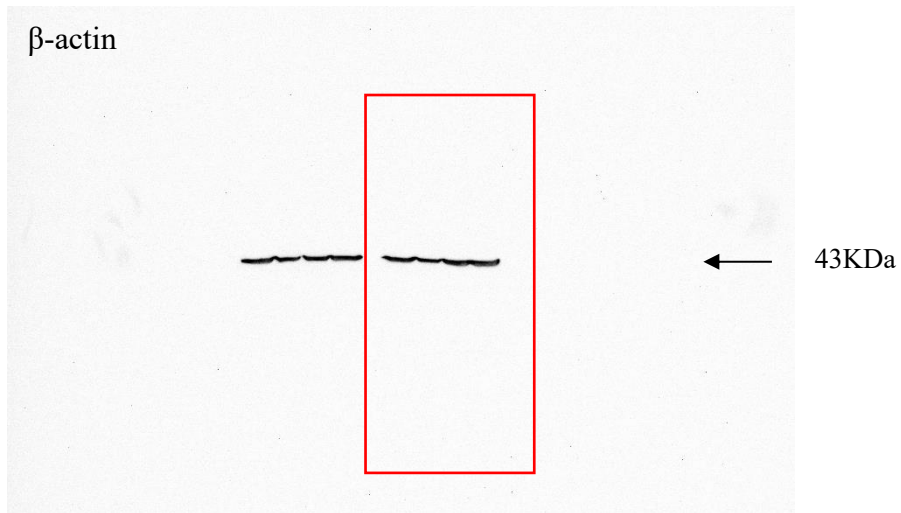

Lane: 1: U251 2: A172 3: T98 4: U87MG

# Supplementary Figure1-B

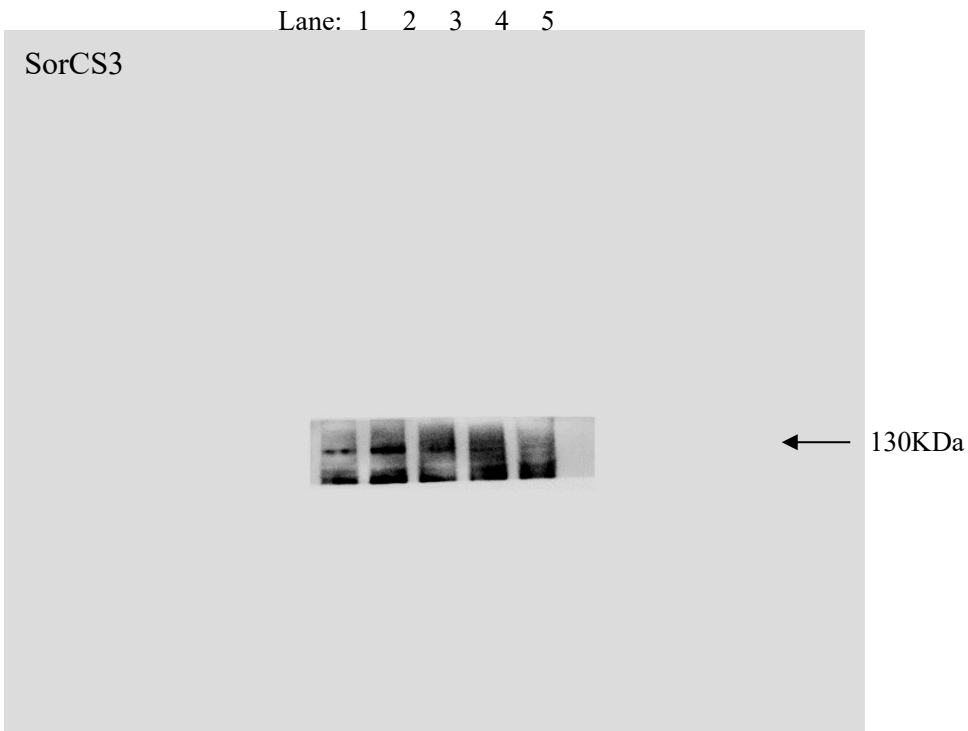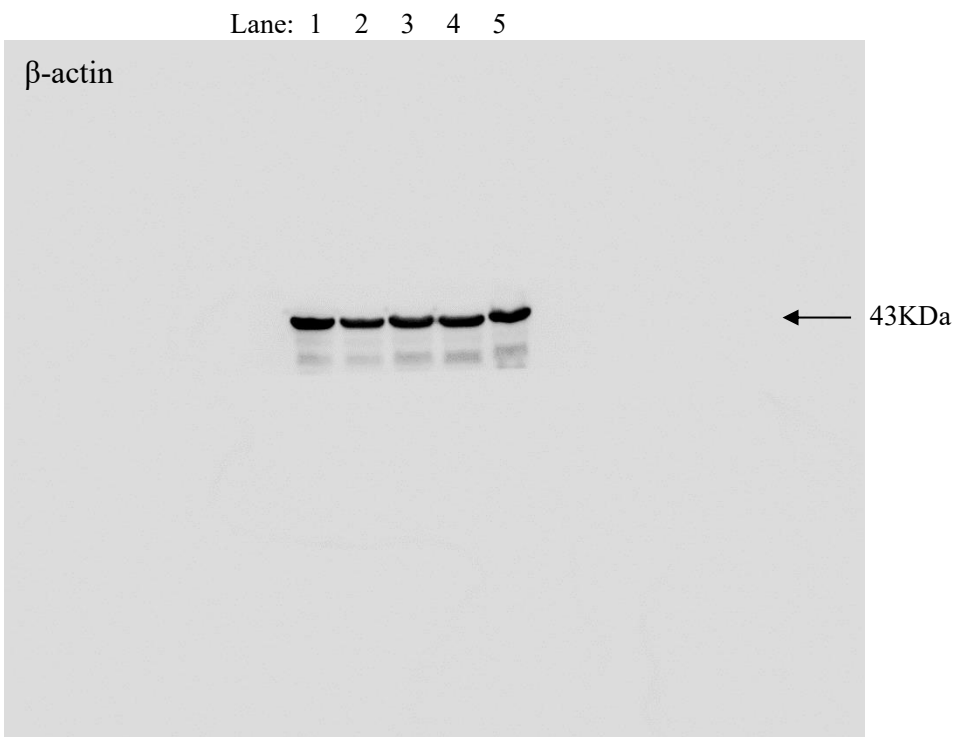

Lane: 1: NC 2: OE-SorCS3 3: NC 4: si-SorCS3-1# 5: siSorCS3-2#

# Supplementary Figure2-A

A172

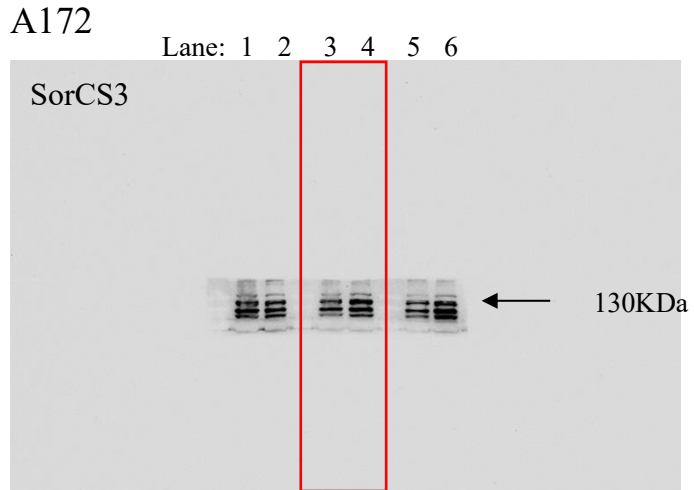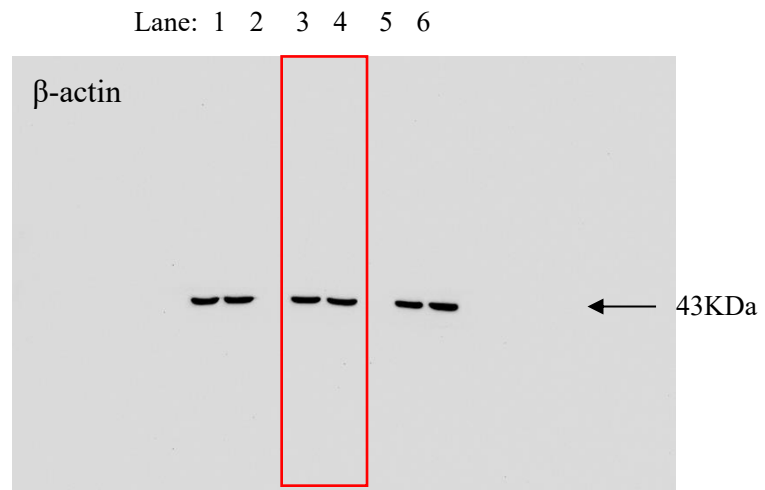

T98

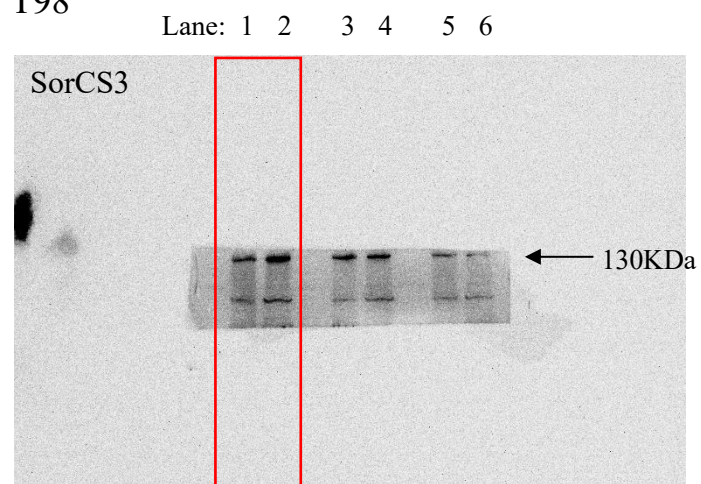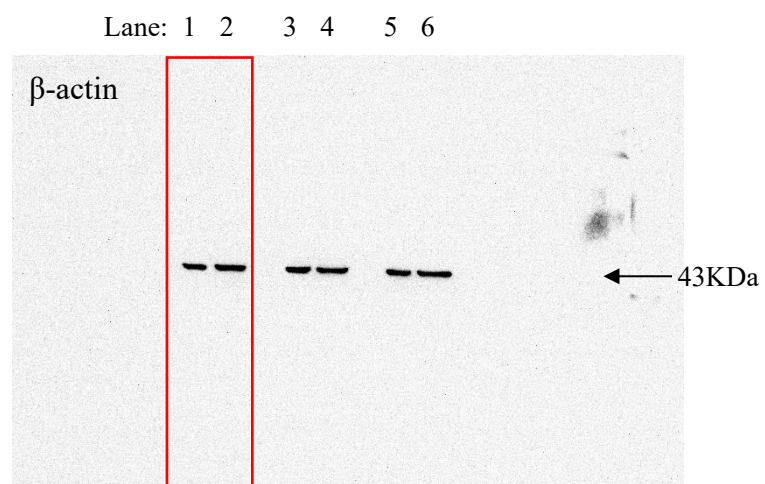

Lane: 1, 3, 5: NC 2, 4, 6: OE-SorSC3-Flag
